# Supplementary material for: A Self-Cleaning Hierarchical Thermal Cloak
Source: Research Square preprint supplement (doi:10.21203/rs.3.rs-6321675/v1), 2025-04-15
Supplement: Supplementary file 1 [file 67a932efe82cfc7bcf30f37e.xlsx]

## Sheet: Data from studies
2.98188	0.183513	0.816487	Ge/ZnS	2.94281	0.270046	Al2O3/Ge/ZnS/GST/Ni	1.01238	0.961812	0.0381877	Ge/ZnS/Pt/Ag/Au/SiO2	2.50392	0.212857	ITO/ZnS	2.99023	0.359838	Au-Si3N4-Au	3.02245	0.813379	Si/GST/Au	3.07875	0.659495	Au- Si3N4-ITO	3.07948	0.142984	VO2/SiO2/ITO	2.97233	0.135792	Ge/SiO2/Pt/ZnS/Au	3	0.13	OPA/Cu	24.9898	0.16721	This Work
3.03624	0.24086	0.75914		3.09532	0.295853		1.06683	0.930744	0.0692557		2.63333	0.252857		3.08795	0.292453		3.11224	0.99		3.12506	0.614813		3.49277	0.171492		3.16604	0.36833		3.09917	0.127226		24.9297	0.15247
3.10873	0.544803	0.455197		3.19064	0.345622		1.20297	0.493204	0.506796		2.63333	0.678571		3.18567	0.252022		3.29184	0.997256		3.18897	0.568294		3.68353	0.18931		3.26289	0.22256		3.42511	0.121611		24.8699	0.15247
3.18122	0.126165	0.873835		3.31456	0.284793		1.28465	0.933333	0.0666667		2.76275	0.587143		3.34202	0.222372		3.33673	0.956089		3.25705	0.525783		4.09682	0.232071		3.41509	0.059436		3.73778	0.105857		24.8104	0.14856
3.25371	0.346953	0.653047		3.41941	0.192627		1.31188	0.526861	0.473139		2.76275	0.518571		3.45928	0.190027		3.35918	0.813379		3.35663	0.475452		4.38295	0.29265		3.58113	0.0386117		4.05093	0.103597		24.7512	0.1466
3.39868	0.0315412	0.968459		3.7435	0.196313		1.39356	0.99288	0.00711974		2.80588	0.441429		3.79153	0.138814		3.42653	0.643225		3.46373	0.427249		4.5737	0.335412		3.85786	0.059436		4.36859	0.103236		24.6923	0.14571
3.67051	-0.00286738	1.00287		3.96274	0.164977		1.44802	0.154045	0.845955		2.90294	0.318571		3.81107	0.187332		3.53878	0.451115		3.68751	0.408821		4.74855	0.381737		4.01006	0.146204		4.67798	0.102402		24.6336	0.14502
3.77924	0.0401434	0.959857		4.11525	0.148387		1.58416	0.979935	0.0200647		3.02157	0.247143		3.86971	0.214286		3.60612	0.335849		4.01209	0.433956		4.85983	0.424499		4.07925	0.392625		5.00389	0.10413		24.5753	0.14403
3.83361	0.114695	0.885305		4.23917	0.0709677		1.63861	0.516505	0.483495		3.23725	0.207143		3.94788	0.249326		3.83061	0.23705		4.25511	0.386774		5.01879	0.470824		4.20377	0.996529		5.31028	0.110226		24.5172	0.14267
3.88797	0.269534	0.730466		4.35355	0.137327		1.74752	0.444013	0.555987		3.58235	0.212857		4.12378	0.233154		4.1898	0.278216		4.40524	0.344287		5.20954	0.524276		4.34214	0.250325		5.59264	0.125852		24.4593	0.14136
3.86985	0.487455	0.512545		4.73484	0.174194		1.89728	0.664078	0.335922		3.90588	0.23		4.2215	0.203504		4.45918	0.33036		4.76456	0.333462		5.44798	0.606236		4.38365	0.149675		5.7687	0.182425		24.4018	0.14027
3.97858	0.616487	0.383513		4.9636	0.236866		2.0198	0.469903	0.530097		4.22941	0.252857		4.31922	0.160377		4.77347	0.434648		5.08376	0.357824		5.71821	0.677506		4.43899	0.0941432		5.8705	0.240841		24.3445	0.1398
4.10544	0.243728	0.756272		5.26863	0.439631		2.19678	0.0569579	0.943042		4.57451	0.292857		4.41694	0.149596		4.88571	0.500515		5.25805	0.41294		5.84538	0.681069		4.54969	0.0455531		6.00942	0.315555		24.2875	0.14004
4.19605	0.0802867	0.919713		5.41161	0.63871		2.37376	0.438835	0.561165		4.89804	0.335714		4.61238	0.168464		5.06531	0.580103		5.36432	0.455927		6.1315	0.638307		4.75723	0.0160521		6.06574	0.367031		24.2308	0.14075
4.45881	0.00860215	0.991398		5.526	0.756682		2.59158	0.982524	0.0174757		5.04902	0.401429		4.82736	0.130728		5.2	0.645969		5.45	0.502208		6.22688	0.606236		4.88176	0.0698482		6.16999	0.414523		24.1743	0.14225
4.63097	0.0286738	0.971326		5.68804	0.57235		2.67327	0.754693	0.245307		5.13529	0.464286		5.0228	0.122642		5.40204	0.722813		5.52641	0.553743		6.41763	0.563474		4.92327	0.135792		6.25934	0.446461		24.1181	0.14371
4.84843	0.194982	0.805018		5.77383	0.410138		2.93193	0.199353	0.800647		5.1353	0.521429		5.3355	0.101078		5.53673	0.788679		5.47779	0.605277		6.60838	0.506459		4.97862	0.316269		6.3974	0.464407		24.0621	0.14518
5.0659	0.173477	0.826523		5.974	0.236866		3.16337	0.174757	0.825243		5.22157	0.59		5.49186	0.114555		5.80612	0.873756		5.63988	0.615821		6.86272	0.453007		5.02013	0.51757		6.49137	0.451874		24.0064	0.1471
5.33773	0.883154	0.116846		6.08839	0.15576		3.3948	0.102265	0.897735		5.22157	0.687143		5.60912	0.157682		6.03061	0.920412		5.72093	0.665321		7.05347	0.424499		5.08931	0.606074		6.5498	0.429506		23.9509	0.14908
5.44646	0.501792	0.498208		6.31716	0.083871		3.5854	0.0776699	0.92233		5.3402	0.784286		5.80456	0.195418		6.3449	0.879245		5.80198	0.710626		7.37139	0.385301		5.24151	0.585249		6.74775	0.415313		23.8958	0.15111
5.6458	0.243728	0.756272		6.75563	0.16682		3.73515	0.0841424	0.915858		5.39412	0.855714		6.07818	0.249326		6.68163	0.816123		5.97218	0.751972		7.56214	0.371047		5.37987	0.656399		6.87118	0.395994		23.8408	0.15237
5.82702	0.326882	0.673118		7.02253	0.299539		3.8849	0.128155	0.871845		5.5451	0.904286		6.23453	0.303235		6.86122	0.763979		6.30448	0.737294		7.68931	0.371047		5.53208	0.836876		6.95688	0.363147		23.7861	0.15214
5.89951	0.412903	0.587097		7.20364	0.439631		4.03465	0.288673	0.711327		5.65294	0.932857		6.34202	0.381402		7.01837	0.703602		6.45037	0.684245		7.75289	0.403118		5.69811	0.987852		7.057	0.325798		23.7317	0.15027
5.93575	0.570609	0.429391		7.34662	0.579724		4.08911	0.604531	0.395469		5.84706	0.872857		6.46906	0.505391		7.22041	0.654202		6.55689	0.636363		7.84827	0.453007		5.87799	0.819523		7.0787	0.285575		23.6775	0.147
6.00824	0.814337	0.185663		7.5182	0.793548		4.18441	0.917799	0.0822006		6.08431	0.815714		6.53746	0.602426		7.60204	0.560892		6.48279	0.588482		7.91185	0.510022		6.00252	0.642516		7.18842	0.217796		23.6236	0.14413
6.11697	0.980645	0.0193548		7.67071	0.96682		4.26609	0.547573	0.452427		6.28922	0.744286		6.62541	0.688679		7.82653	0.506003		6.6629	0.58713		7.97543	0.577728		6.15472	0.524512		7.31233	0.169846		23.5699	0.14057
6.28007	0.768459	0.231541		7.81369	1.04055		4.33416	0.252427	0.747573		6.41863	0.692857		6.77199	0.765499		8.21939	0.456604		6.75835	0.535303		8.13439	0.53853		6.34843	0.475922		7.56765	0.126503		23.5165	0.13781
6.44316	0.653763	0.346237		8.01386	0.9447		4.38861	0.159223	0.840777		6.67745	0.604286		6.85993	0.702156		8.5449	0.385249		6.90424	0.489876		8.26156	0.495768		6.56981	0.541866		7.88305	0.111373		23.4633	0.13599
6.58814	0.756989	0.243011		8.13778	0.782488		4.52475	0.0634304	0.93657		7.13039	0.501429		7.05537	0.597035		8.72449	0.349571		7.05013	0.445763		8.35694	0.463697		6.6805	0.652928		8.19845	0.111734		23.4103	0.13484
6.69687	0.888889	0.111111		8.28076	0.612903		4.55198	0.0453074	0.954693		7.55098	0.427143		7.19218	0.505391		9.01633	0.322127		7.22549	0.403417		8.53179	0.406682		6.86038	0.772668		8.51385	0.120945		23.3576	0.13383
6.84185	0.969176	0.0308244		8.38562	0.513364		4.7698	0.0349515	0.965049		7.91765	0.39		7.2899	0.446092		9.26327	0.319383		7.4424	0.362036		8.64306	0.367483		6.97107	0.694577		8.82926	0.133891		23.3051	0.13259
6.95058	0.837276	0.162724		8.57626	0.373272		4.87871	0.117799	0.882201		8.34902	0.344286		7.36808	0.392183		9.62245	0.346827		7.68636	0.331255		8.84971	0.321158		7.04025	0.538395		9.1409	0.141651		23.2528	0.13107
7.09555	0.756989	0.243011		8.91941	0.225806		4.90594	0.234304	0.765696		8.73725	0.318571		7.58306	0.338275		9.95918	0.390738		8.0065	0.304		9.05636	0.289087		7.12327	0.378742		9.46231	0.150386		23.2008	0.12948
7.24053	0.868817	0.131183		9.46274	0.129954		4.98762	0.371521	0.628479		9.29804	0.287143		7.83713	0.295148		10.2061	0.407204		8.36311	0.289865		9.34249	0.338976		7.20629	0.250325		9.77396	0.162938		23.149	0.12754
7.3855	0.97491	0.0250896		10.149	0.107834		5.02847	0.534628	0.465372		9.83725	0.27		8.23779	0.254717		10.4306	0.459348		8.71973	0.280085		9.53324	0.360356		7.27547	0.160087		10.0909	0.193517		23.0975	0.12606
7.47611	0.85448	0.14552		10.9307	0.129954		5.06931	0.713269	0.286731		10.5922	0.255714		8.52117	0.257412		10.5653	0.511492		9.07634	0.266223		9.78757	0.335412		7.37233	0.0906725		10.3762	0.232433		23.0461	0.1251
7.52142	0.73405	0.26595		11.6742	0.163134		5.15099	0.90356	0.0964401		11.3471	0.244286		8.77524	0.230458		10.7	0.508748		9.43296	0.258745		10.0101	0.285523		7.62138	0.0524946		10.6766	0.274729		22.995	0.12461
7.5486	0.576344	0.423656		12.3986	0.258986		5.30074	0.757282	0.242718		12.0804	0.232857		9.08795	0.203504		10.8796	0.464837		9.78957	0.254004		10.2962	0.249889		8.03648	0.0767896		10.986	0.29738		22.9442	0.12428
7.63921	0.441577	0.558423		13.0087	0.317972		5.40965	0.708091	0.291909		12.8569	0.227143		9.39088	0.183288		11.1041	0.401715		10.1462	0.251351		10.8367	0.228508		8.34088	0.118438		11.3119	0.307843		22.8935	0.12372
7.64827	0.301075	0.698925		13.6854	0.378802		5.54579	0.662783	0.337217		13.6333	0.215714		9.65472	0.171159		11.3286	0.352316		10.5028	0.250688		11.3136	0.235635		8.67296	0.104555		11.6228	0.314939		22.8431	0.12278
7.73888	0.169176	0.830824		13.9905	0.402765		5.70916	0.767638	0.232362		13.8922	0.215714		10.1042	0.190027		11.4857	0.291938		10.8594	0.249528		11.7269	0.253452		8.86667	0.0733189		11.9382	0.320634		22.7929	0.12144
8.03789	0.0200717	0.979928					5.87252	0.920388	0.0796117		14	0.215714		10.5342	0.203504		11.6878	0.242539		11.216	0.247539		11.9176	0.310468		9.0327	0.153145		12.2536	0.320844		22.7429	0.12098
8.59967	0.00573477	0.994265					5.96782	0.974757	0.0252427					11.0619	0.222372		11.9347	0.215094		11.5726	0.249163		12.2038	0.371047		9.15723	0.246855		12.5713	0.318547		22.6931	0.12081
9.23394	0.0329749	0.967025					6.0495	0.987702	0.0122977					11.355	0.230458		12.3388	0.184906		11.9293	0.250346		12.3627	0.321158		9.30943	0.337093		12.8777	0.317439		22.6436	0.12034
9.80478	0.114695	0.885305					6.34901	0.956634	0.0433657					11.6873	0.235849		12.7653	0.168439		12.2859	0.255617		12.776	0.278396		9.53082	0.423861		13.1998	0.313989		22.5942	0.12008
10.0947	0.206452	0.793548					6.40347	0.935922	0.0640777					11.9218	0.237197		13.2592	0.165695		12.6425	0.260513		13.2847	0.246325		9.66918	0.441215		13.5152	0.311304		22.5451	0.11996
10.1763	0.298208	0.701792					6.62129	0.961812	0.0381877								13.6633	0.165695		12.9991	0.26458		13.7934	0.246325		9.91824	0.396095		13.8484	0.308685		22.4962	0.11898
10.2669	0.435842	0.564158					6.83911	0.99288	0.00711974								13.9776	0.160206		13.3557	0.268824					10.0013	0.3718		14.0184	0.310023		22.4475	0.11899
10.3303	0.564875	0.435125					7.00248	0.920388	0.0796117											13.7123	0.269918					10.2226	0.441215					22.3991	0.11785
10.4028	0.696774	0.303226					7.13861	0.775405	0.224595											13.9393	0.270599					10.3748	0.621692					22.3508	0.11564
10.4753	0.798566	0.201434					7.26114	0.617476	0.382524																	10.4717	0.861171					22.3027	0.11376
10.6203	0.670968	0.329032					7.45173	0.433657	0.566343																	10.5547	0.989588					22.2549	0.1126
10.6746	0.516129	0.483871					7.76485	0.262783	0.737217																	10.6654	0.829935					22.2072	0.1119
10.7834	0.324014	0.675986					7.99629	0.205825	0.794175																	10.7208	0.663341					22.1597	0.11164
10.8558	0.24086	0.75914					8.14604	0.172168	0.827832																	10.7761	0.486334					22.1125	0.11153
11.0733	0.126165	0.873835					8.32302	0.16699	0.83301																	10.8314	0.378742					22.0654	0.11128
11.4086	0.0688172	0.931183					8.44554	0.151456	0.848544																	10.9145	0.267679					22.0186	0.11082
11.916	0.0516129	0.948387					8.69059	0.138511	0.861489																	11.1082	0.132321					21.9719	0.1103
12.4959	0.0501792	0.949821					8.96287	0.0944984	0.905502																	11.3019	0.114967					21.9255	0.10984
13.2661	0.0602151	0.939785					9.13985	0.213592	0.786408																	11.4679	0.101085					21.8792	0.10937
13.6557	0.0774194	0.922581					9.37129	0.396117	0.603883																	11.717	0.123644					21.8332	0.10898
14	0.111828	0.888172					9.54827	0.429773	0.570227																	11.9799	0.156616					21.7873	0.10827
							9.7797	0.464725	0.535275																	12.2428	0.194794					21.7416	0.10701
							10.0792	0.377994	0.622006																	12.5472	0.215618					21.6961	0.1052
							10.3651	0.708091	0.291909																	12.8931	0.170499					21.6509	0.10312
							10.5965	0.944984	0.0550162																	13.1698	0.121909					21.6058	0.10114
							10.896	0.480259	0.519741																	13.5987	0.0872017					21.5608	0.09965
							11.005	0.262783	0.737217																	13.8201	0.0802603					21.5161	0.09879
							11.1002	0.146278	0.853722																	13.9862	0.0733189					21.4716	0.09849
							11.1955	0.120388	0.879612																							21.4272	0.09843
							11.5495	0.212298	0.787702																							21.383	0.09835
							11.9035	0.159223	0.840777																							21.339	0.09771
							12.1213	0.190291	0.809709																							21.2952	0.09647
							12.3527	0.220065	0.779935																							21.2516	0.09518
							12.6658	0.169579	0.830421																							21.2081	0.09383
							12.8837	0.130744	0.869256																							21.1648	0.09265
							13.2376	0.1411	0.8589																							21.1217	0.09168
							13.7005	0.102265	0.897735																							21.0788	0.09074
							14.0136	0.0660194	0.933981																							21.036	0.09052
																																20.9934	0.08945
																																20.951	0.08798
																																20.9088	0.08669
																																20.8667	0.0858
																																20.8248	0.0854
																																20.7831	0.08539
																																20.7415	0.08546
																																20.7001	0.0853
																																20.6589	0.08472
																																20.6178	0.08412
																																20.5769	0.08302
																																20.5362	0.08211
																																20.4956	0.08155
																																20.4551	0.08132
																																20.4149	0.08118
																																20.3748	0.08087
																																20.3348	0.0802
																																20.295	0.07918
																																20.2554	0.07806
																																20.2159	0.07715
																																20.1766	0.07666
																																20.1374	0.07652
																																20.0984	0.07661
																																20.0595	0.07658
																																20.0208	0.07672
																																19.9822	0.07675
																																19.9438	0.07595
																																19.9055	0.07553
																																19.8674	0.07562
																																19.8294	0.07573
																																19.7915	0.07573
																																19.7538	0.07545
																																19.7163	0.0747
																																19.6789	0.0736
																																19.6416	0.07296
																																19.6045	0.07203
																																19.5675	0.0714
																																19.5306	0.07136
																																19.4939	0.07129
																																19.4573	0.07128
																																19.4209	0.07182
																																19.3846	0.07201
																																19.3484	0.07154
																																19.3124	0.07168
																																19.2765	0.07179
																																19.2407	0.07189
																																19.2051	0.07196
																																19.1696	0.07146
																																19.1343	0.07025
																																19.099	0.0697
																																19.0639	0.06915
																																19.0289	0.06876
																																18.9941	0.06962
																																18.9593	0.06942
																																18.9247	0.06932
																																18.8903	0.06913
																																18.8559	0.06883
																																18.8217	0.06852
																																18.7876	0.06835
																																18.7536	0.06844
																																18.7198	0.06881
																																18.6861	0.06937
																																18.6525	0.06994
																																18.619	0.07044
																																18.5856	0.07019
																																18.5524	0.07047
																																18.5192	0.07021
																																18.4862	0.07028
																																18.4533	0.07067
																																18.4205	0.07135
																																18.3879	0.07216
																																18.3553	0.07289
																																18.3229	0.07341
																																18.2906	0.07405
																																18.2584	0.0742
																																18.2263	0.07438
																																18.1943	0.07469
																																18.1624	0.07514
																																18.1307	0.07548
																																18.0991	0.0756
																																18.0675	0.07579
																																18.0361	0.07585
																																18.0048	0.07587
																																17.9736	0.07599
																																17.9425	0.07627
																																17.9115	0.07668
																																17.8806	0.07711
																																17.8498	0.07771
																																17.8192	0.07785
																																17.7886	0.07774
																																17.7582	0.07761
																																17.7278	0.0778
																																17.6975	0.07822
																																17.6674	0.0788
																																17.6374	0.0794
																																17.6074	0.08021
																																17.5776	0.08037
																																17.5478	0.08031
																																17.5182	0.08022
																																17.4886	0.08014
																																17.4592	0.08023
																																17.4298	0.08049
																																17.4006	0.08084
																																17.3715	0.08113
																																17.3424	0.0813
																																17.3135	0.08135
																																17.2846	0.08139
																																17.2558	0.08154
																																17.2272	0.08185
																																17.1986	0.08228
																																17.1701	0.08272
																																17.1418	0.08302
																																17.1135	0.08313
																																17.0853	0.08308
																																17.0572	0.08302
																																17.0292	0.0831
																																17.0012	0.08338
																																16.9734	0.08386
																																16.9457	0.08439
																																16.9181	0.0848
																																16.8905	0.08496
																																16.863	0.0849
																																16.8357	0.08472
																																16.8084	0.08461
																																16.7812	0.08469
																																16.7541	0.08498
																																16.727	0.08539
																																16.7001	0.0858
																																16.6732	0.08611
																																16.6465	0.08628
																																16.6198	0.08638
																																16.5932	0.08653
																																16.5667	0.0868
																																16.5403	0.08717
																																16.514	0.08757
																																16.4877	0.08791
																																16.4615	0.08813
																																16.4354	0.08827
																																16.4094	0.08842
																																16.3835	0.08871
																																16.3577	0.08923
																																16.3319	0.08996
																																16.3062	0.09081
																																16.2806	0.09164
																																16.2551	0.09236
																																16.2297	0.09295
																																16.2043	0.0935
																																16.179	0.09411
																																16.1538	0.09486
																																16.1287	0.09575
																																16.1037	0.0967
																																16.0787	0.09761
																																16.0538	0.09841
																																16.029	0.0991
																																16.0043	0.09975
																																15.9796	0.10047
																																15.955	0.10133
																																15.9305	0.10236
																																15.9061	0.10349
																																15.8817	0.10465
																																15.8574	0.10579
																																15.8332	0.10691
																																15.8091	0.10809
																																15.785	0.1094
																																15.761	0.11087
																																15.7371	0.11244
																																15.7133	0.11402
																																15.6895	0.11548
																																15.6658	0.11677
																																15.6422	0.1179
																																15.6186	0.119
																																15.5951	0.12018
																																15.5717	0.12152
																																15.5484	0.123
																																15.5251	0.12455
																																15.5019	0.12605
																																15.4787	0.12745
																																15.4557	0.12878
																																15.4327	0.13012
																																15.4098	0.13161
																																15.3869	0.13331
																																15.3641	0.1352
																																15.3414	0.13716
																																15.3187	0.13907
																																15.2961	0.14085
																																15.2736	0.14252
																																15.2511	0.14419
																																15.2287	0.14596
																																15.2064	0.1479
																																15.1841	0.14997
																																15.1619	0.15204
																																15.1398	0.15397
																																15.1177	0.15571
																																15.0957	0.15729
																																15.0738	0.15885
																																15.0519	0.16057
																																15.0301	0.16259
																																15.0083	0.16498
																																14.9866	0.16765
																																14.965	0.17037
																																14.9435	0.17287
																																14.922	0.17503
																																14.9005	0.1769
																																14.8791	0.17865
																																14.8578	0.18044
																																14.8366	0.18237
																																14.8154	0.18443
																																14.7942	0.18659
																																14.7732	0.18877
																																14.7522	0.19098
																																14.7312	0.19324
																																14.7103	0.1956
																																14.6895	0.1981
																																14.6687	0.2007
																																14.648	0.20334
																																14.6273	0.20592
																																14.6067	0.20838
																																14.5862	0.21075
																																14.5657	0.2131
																																14.5452	0.21551
																																14.5249	0.21805
																																14.5046	0.22068
																																14.4843	0.22331
																																14.4641	0.22584
																																14.444	0.22818
																																14.4239	0.23034
																																14.4038	0.2324
																																14.3839	0.23443
																																14.3639	0.23651
																																14.3441	0.23861
																																14.3243	0.24069
																																14.3045	0.24265
																																14.2848	0.24445
																																14.2652	0.24609
																																14.2455	0.24765
																																14.226	0.24921
																																14.2065	0.25083
																																14.1871	0.2525
																																14.1677	0.25415
																																14.1484	0.25568
																																14.1291	0.25706
																																14.1099	0.25828
																																14.0907	0.25942
																																14.0716	0.26056
																																14.0525	0.26178
																																14.0335	0.26307
																																14.0145	0.26435
																																13.9956	0.26555
																																13.9768	0.26661
																																13.958	0.26753
																																13.9392	0.26837
																																13.9205	0.26923
																																13.9018	0.27017
																																13.8832	0.2712
																																13.8646	0.27223
																																13.8461	0.27319
																																13.8277	0.274
																																13.8093	0.27466
																																13.7909	0.27523
																																13.7726	0.27578
																																13.7543	0.27634
																																13.7361	0.27689
																																13.7179	0.27736
																																13.6998	0.27766
																																13.6817	0.27771
																																13.6637	0.27752
																																13.6457	0.27716
																																13.6278	0.2767
																																13.6099	0.2762
																																13.5921	0.27566
																																13.5743	0.275
																																13.5565	0.27414
																																13.5389	0.27301
																																13.5212	0.27163
																																13.5036	0.27004
																																13.486	0.26834
																																13.4685	0.26659
																																13.4511	0.26479
																																13.4336	0.26289
																																13.4162	0.26083
																																13.3989	0.25856
																																13.3816	0.25611
																																13.3644	0.25355
																																13.3472	0.25098
																																13.33	0.24845
																																13.3129	0.24596
																																13.2958	0.24345
																																13.2788	0.24085
																																13.2618	0.23813
																																13.2449	0.23531
																																13.228	0.23246
																																13.2112	0.22967
																																13.1944	0.227
																																13.1776	0.22444
																																13.1609	0.22191
																																13.1442	0.21935
																																13.1275	0.21671
																																13.111	0.21402
																																13.0944	0.21135
																																13.0779	0.20878
																																13.0614	0.20637
																																13.045	0.20409
																																13.0286	0.20186
																																13.0122	0.19961
																																12.9959	0.19727
																																12.9797	0.19487
																																12.9634	0.19248
																																12.9473	0.19017
																																12.9311	0.188
																																12.915	0.18596
																																12.899	0.18398
																																12.8829	0.18196
																																12.8669	0.17988
																																12.851	0.17772
																																12.8351	0.17556
																																12.8192	0.17348
																																12.8034	0.17151
																																12.7876	0.16963
																																12.7719	0.16777
																																12.7562	0.16585
																																12.7405	0.16381
																																12.7249	0.16169
																																12.7093	0.15955
																																12.6937	0.15749
																																12.6782	0.15554
																																12.6627	0.1537
																																12.6473	0.1519
																																12.6319	0.15005
																																12.6165	0.14812
																																12.6012	0.14613
																																12.5859	0.14416
																																12.5706	0.14228
																																12.5554	0.14054
																																12.5402	0.13891
																																12.5251	0.13733
																																12.51	0.1357
																																12.4949	0.134
																																12.4799	0.13225
																																12.4649	0.13054
																																12.4499	0.12897
																																12.435	0.12759
																																12.4201	0.12637
																																12.4052	0.12525
																																12.3904	0.12413
																																12.3756	0.12298
																																12.3609	0.12181
																																12.3461	0.12071
																																12.3315	0.11976
																																12.3168	0.11899
																																12.3022	0.11835
																																12.2876	0.11776
																																12.2731	0.11712
																																12.2586	0.1164
																																12.2441	0.11561
																																12.2297	0.11485
																																12.2153	0.1142
																																12.2009	0.11371
																																12.1866	0.11335
																																12.1723	0.11303
																																12.158	0.11267
																																12.1438	0.11222
																																12.1296	0.11172
																																12.1154	0.11124
																																12.1012	0.11088
																																12.0871	0.11067
																																12.0731	0.11057
																																12.059	0.1105
																																12.045	0.11035
																																12.0311	0.11008
																																12.0171	0.10972
																																12.0032	0.10935
																																11.9893	0.10908
																																11.9755	0.10893
																																11.9617	0.10889
																																11.9479	0.10887
																																11.9341	0.10878
																																11.9204	0.10855
																																11.9067	0.10824
																																11.8931	0.10791
																																11.8795	0.10767
																																11.8659	0.10757
																																11.8523	0.10756
																																11.8388	0.10757
																																11.8253	0.1075
																																11.8118	0.10731
																																11.7984	0.10704
																																11.785	0.10678
																																11.7716	0.10661
																																11.7582	0.10658
																																11.7449	0.10665
																																11.7316	0.10673
																																11.7184	0.10672
																																11.7051	0.10656
																																11.692	0.10629
																																11.6788	0.10599
																																11.6656	0.10578
																																11.6525	0.10571
																																11.6395	0.10574
																																11.6264	0.1058
																																11.6134	0.10579
																																11.6004	0.10566
																																11.5874	0.10545
																																11.5745	0.10524
																																11.5616	0.1051
																																11.5487	0.10509
																																11.5359	0.10516
																																11.5231	0.10524
																																11.5103	0.10522
																																11.4975	0.10508
																																11.4848	0.10483
																																11.4721	0.10459
																																11.4594	0.10443
																																11.4468	0.1044
																																11.4341	0.10447
																																11.4215	0.10455
																																11.409	0.10456
																																11.3964	0.10443
																																11.3839	0.10422
																																11.3714	0.104
																																11.359	0.10387
																																11.3466	0.10386
																																11.3342	0.10395
																																11.3218	0.10405
																																11.3095	0.10407
																																11.2971	0.10397
																																11.2848	0.10379
																																11.2726	0.1036
																																11.2603	0.10352
																																11.2481	0.10356
																																11.2359	0.1037
																																11.2238	0.10385
																																11.2116	0.10392
																																11.1995	0.10387
																																11.1875	0.10373
																																11.1754	0.10359
																																11.1634	0.10354
																																11.1514	0.10361
																																11.1394	0.10377
																																11.1274	0.10393
																																11.1155	0.10402
																																11.1036	0.10398
																																11.0917	0.10385
																																11.0799	0.10372
																																11.068	0.10368
																																11.0563	0.10377
																																11.0445	0.10395
																																11.0327	0.10414
																																11.021	0.10426
																																11.0093	0.10425
																																10.9976	0.10416
																																10.986	0.10407
																																10.9743	0.10405
																																10.9627	0.10415
																																10.9512	0.10433
																																10.9396	0.10452
																																10.9281	0.10463
																																10.9166	0.10461
																																10.9051	0.10452
																																10.8937	0.10441
																																10.8822	0.10439
																																10.8708	0.10449
																																10.8594	0.10467
																																10.8481	0.10486
																																10.8367	0.10497
																																10.8254	0.10498
																																10.8141	0.1049
																																10.8029	0.10482
																																10.7916	0.10482
																																10.7804	0.10493
																																10.7692	0.10512
																																10.7581	0.10532
																																10.7469	0.10544
																																10.7358	0.10544
																																10.7247	0.10536
																																10.7136	0.10528
																																10.7025	0.10527
																																10.6915	0.10537
																																10.6805	0.10556
																																10.6695	0.10575
																																10.6585	0.10586
																																10.6476	0.10587
																																10.6367	0.10581
																																10.6258	0.10575
																																10.6149	0.10577
																																10.6041	0.10591
																																10.5932	0.10614
																																10.5824	0.10638
																																10.5716	0.10654
																																10.5609	0.1066
																																10.5501	0.10657
																																10.5394	0.10655
																																10.5287	0.1066
																																10.518	0.10676
																																10.5074	0.107
																																10.4967	0.10726
																																10.4861	0.10745
																																10.4755	0.10754
																																10.4649	0.10756
																																10.4544	0.10758
																																10.4439	0.10767
																																10.4334	0.10788
																																10.4229	0.10816
																																10.4124	0.10846
																																10.402	0.10869
																																10.3915	0.10882
																																10.3811	0.10888
																																10.3708	0.10894
																																10.3604	0.10907
																																10.3501	0.10931
																																10.3397	0.10962
																																10.3294	0.10994
																																10.3192	0.11018
																																10.3089	0.11031
																																10.2987	0.11037
																																10.2884	0.11042
																																10.2783	0.11053
																																10.2681	0.11076
																																10.2579	0.11105
																																10.2478	0.11136
																																10.2377	0.1116
																																10.2276	0.11174
																																10.2175	0.11181
																																10.2074	0.11188
																																10.1974	0.11203
																																10.1874	0.1123
																																10.1774	0.11264
																																10.1674	0.113
																																10.1575	0.1133
																																10.1475	0.1135
																																10.1376	0.11363
																																10.1277	0.11374
																																10.1178	0.11392
																																10.108	0.11419
																																10.0981	0.11453
																																10.0883	0.11486
																																10.0785	0.11513
																																10.0687	0.11529
																																10.0589	0.11538
																																10.0492	0.11547
																																10.0395	0.11563
																																10.0297	0.11589
																																10.0201	0.11621
																																10.0104	0.11654
																																10.0007	0.1168
																																9.9911	0.11695
																																9.98148	0.11702
																																9.97189	0.11708
																																9.9623	0.1172
																																9.95274	0.11741
																																9.9432	0.11769
																																9.93368	0.11797
																																9.92417	0.11817
																																9.91468	0.11828
																																9.90522	0.11831
																																9.89577	0.11833
																																9.88633	0.11842
																																9.87691	0.11861
																																9.86752	0.11887
																																9.85814	0.11914
																																9.84877	0.11934
																																9.83943	0.11944
																																9.83011	0.11947
																																9.8208	0.11949
																																9.8115	0.11958
																																9.80223	0.11977
																																9.79298	0.12004
																																9.78374	0.12031
																																9.77451	0.12051
																																9.76531	0.12062
																																9.75613	0.12066
																																9.74696	0.12071
																																9.7378	0.12083
																																9.72867	0.12106
																																9.71955	0.12137
																																9.71045	0.12167
																																9.70136	0.12188
																																9.6923	0.12199
																																9.68325	0.12201
																																9.67422	0.12202
																																9.6652	0.12211
																																9.6562	0.12229
																																9.64722	0.12256
																																9.63826	0.12283
																																9.6293	0.12304
																																9.62037	0.12314
																																9.61146	0.12317
																																9.60256	0.12319
																																9.59367	0.12329
																																9.58481	0.1235
																																9.57596	0.12377
																																9.56713	0.12405
																																9.5583	0.12426
																																9.5495	0.12435
																																9.54072	0.12438
																																9.53195	0.1244
																																9.52319	0.12449
																																9.51446	0.1247
																																9.50574	0.12498
																																9.49704	0.12526
																																9.48834	0.12546
																																9.47967	0.12555
																																9.47102	0.12556
																																9.46238	0.12557
																																9.45375	0.12565
																																9.44514	0.12584
																																9.43654	0.1261
																																9.42797	0.12638
																																9.4194	0.12658
																																9.41085	0.12668
																																9.40232	0.1267
																																9.39381	0.12672
																																9.38531	0.12681
																																9.37682	0.12701
																																9.36835	0.12729
																																9.3599	0.12756
																																9.35145	0.12777
																																9.34303	0.12787
																																9.33462	0.1279
																																9.32623	0.12794
																																9.31785	0.12805
																																9.30948	0.12828
																																9.30113	0.12858
																																9.2928	0.12888
																																9.28447	0.1291
																																9.27617	0.1292
																																9.26788	0.12921
																																9.25961	0.12923
																																9.25135	0.12933
																																9.2431	0.12954
																																9.23487	0.12984
																																9.22666	0.13014
																																9.21845	0.13037
																																9.21027	0.1305
																																9.2021	0.13055
																																9.19394	0.1306
																																9.1858	0.13073
																																9.17766	0.13097
																																9.16955	0.13128
																																9.16145	0.13159
																																9.15336	0.13183
																																9.14529	0.13196
																																9.13723	0.13202
																																9.12919	0.13208
																																9.12117	0.13223
																																9.11315	0.13249
																																9.10515	0.13283
																																9.09716	0.13317
																																9.08919	0.13344
																																9.08123	0.1336
																																9.07328	0.13369
																																9.06535	0.13378
																																9.05743	0.13396
																																9.04953	0.13426
																																9.04164	0.13464
																																9.03377	0.13502
																																9.02591	0.13534
																																9.01805	0.13556
																																9.01022	0.13571
																																9.0024	0.13587
																																8.99459	0.1361
																																8.98679	0.13645
																																8.97901	0.13687
																																8.97125	0.1373
																																8.9635	0.13765
																																8.95575	0.1379
																																8.94803	0.13808
																																8.94031	0.13827
																																8.93261	0.13854
																																8.92492	0.13892
																																8.91725	0.13936
																																8.90959	0.13981
																																8.90195	0.14018
																																8.8943	0.14044
																																8.88668	0.14063
																																8.87908	0.14082
																																8.87148	0.14107
																																8.8639	0.14143
																																8.85633	0.14186
																																8.84877	0.1423
																																8.84123	0.14266
																																8.8337	0.14293
																																8.82618	0.14313
																																8.81868	0.14333
																																8.81118	0.1436
																																8.8037	0.14396
																																8.79624	0.14438
																																8.78878	0.14479
																																8.78134	0.14511
																																8.77391	0.14533
																																8.76649	0.14549
																																8.75909	0.14565
																																8.7517	0.1459
																																8.74432	0.14625
																																8.73695	0.14668
																																8.7296	0.14711
																																8.72226	0.14747
																																8.71492	0.14773
																																8.70761	0.14792
																																8.7003	0.14811
																																8.69301	0.14837
																																8.68573	0.14873
																																8.67846	0.14915
																																8.67121	0.14958
																																8.66396	0.14994
																																8.65673	0.1502
																																8.64951	0.15039
																																8.6423	0.15059
																																8.63511	0.15086
																																8.62792	0.15123
																																8.62075	0.15166
																																8.61359	0.1521
																																8.60644	0.15247
																																8.5993	0.15275
																																8.59218	0.15296
																																8.58507	0.15317
																																8.57797	0.15345
																																8.57088	0.15382
																																8.5638	0.15427
																																8.55674	0.15471
																																8.54968	0.1551
																																8.54264	0.1554
																																8.53561	0.15564
																																8.52859	0.15589
																																8.52158	0.15619
																																8.51458	0.15659
																																8.5076	0.15703
																																8.50063	0.15746
																																8.49367	0.15781
																																8.48671	0.15807
																																8.47977	0.15827
																																8.47285	0.15849
																																8.46593	0.1588
																																8.45902	0.15922
																																8.45213	0.15972
																																8.44525	0.16022
																																8.43837	0.16064
																																8.43151	0.16098
																																8.42466	0.16124
																																8.41783	0.16149
																																8.411	0.16181
																																8.40418	0.16222
																																8.39738	0.16269
																																8.39059	0.16317
																																8.3838	0.16358
																																8.37703	0.16391
																																8.37027	0.16417
																																8.36352	0.16443
																																8.35678	0.16476
																																8.35005	0.16518
																																8.34333	0.16568
																																8.33663	0.16617
																																8.32993	0.1666
																																8.32324	0.16694
																																8.31657	0.16722
																																8.30991	0.16751
																																8.30325	0.16788
																																8.29661	0.16834
																																8.28998	0.16887
																																8.28336	0.16941
																																8.27675	0.16989
																																8.27014	0.17028
																																8.26355	0.17061
																																8.25698	0.17094
																																8.25041	0.17133
																																8.24385	0.17182
																																8.2373	0.17237
																																8.23076	0.17292
																																8.22424	0.17342
																																8.21772	0.17382
																																8.21121	0.17417
																																8.20472	0.17453
																																8.19823	0.17496
																																8.19175	0.17548
																																8.18529	0.17607
																																8.17884	0.17666
																																8.17239	0.17718
																																8.16595	0.1776
																																8.15953	0.17797
																																8.15312	0.17833
																																8.14671	0.17876
																																8.14031	0.17928
																																8.13393	0.17986
																																8.12756	0.18045
																																8.12119	0.18097
																																8.11483	0.18141
																																8.10849	0.1818
																																8.10216	0.18218
																																8.09584	0.18264
																																8.08952	0.18319
																																8.08321	0.1838
																																8.07692	0.18442
																																8.07063	0.18498
																																8.06435	0.18545
																																8.05809	0.18585
																																8.05183	0.18625
																																8.04559	0.1867
																																8.03935	0.18724
																																8.03312	0.18783
																																8.02691	0.18842
																																8.0207	0.18893
																																8.0145	0.18936
																																8.00831	0.18973
																																8.00213	0.1901
																																7.99596	0.19054
																																7.9898	0.19107
																																7.98365	0.19166
																																7.97751	0.19226
																																7.97138	0.1928
																																7.96525	0.19325
																																7.95914	0.19363
																																7.95304	0.19401
																																7.94695	0.19444
																																7.94086	0.19496
																																7.93478	0.19553
																																7.92872	0.19609
																																7.92266	0.19659
																																7.91661	0.197
																																7.91057	0.19736
																																7.90454	0.19775
																																7.89853	0.19822
																																7.89251	0.1988
																																7.88651	0.19944
																																7.88052	0.20009
																																7.87454	0.20065
																																7.86856	0.20112
																																7.86259	0.2015
																																7.85664	0.20188
																																7.85069	0.20233
																																7.84475	0.20287
																																7.83882	0.20349
																																7.8329	0.20412
																																7.82699	0.2047
																																7.82108	0.2052
																																7.81519	0.20565
																																7.80931	0.2061
																																7.80343	0.20663
																																7.79756	0.20725
																																7.79171	0.20794
																																7.78586	0.20864
																																7.78002	0.20929
																																7.77418	0.20984
																																7.76836	0.21033
																																7.76255	0.2108
																																7.75674	0.21131
																																7.75094	0.2119
																																7.74515	0.21253
																																7.73937	0.21316
																																7.73361	0.21374
																																7.72784	0.21423
																																7.72209	0.21469
																																7.71634	0.21515
																																7.71061	0.21569
																																7.70487	0.21632
																																7.69915	0.21701
																																7.69344	0.21771
																																7.68774	0.21834
																																7.68204	0.21889
																																7.67636	0.2194
																																7.67068	0.21993
																																7.66501	0.22054
																																7.65935	0.22127
																																7.6537	0.22207
																																7.64805	0.2229
																																7.64242	0.22368
																																7.63679	0.22439
																																7.63117	0.22505
																																7.62556	0.22571
																																7.61996	0.22643
																																7.61436	0.22723
																																7.60878	0.22808
																																7.6032	0.2289
																																7.59763	0.22962
																																7.59206	0.23022
																																7.58651	0.23073
																																7.58097	0.23123
																																7.57543	0.23179
																																7.5699	0.23244
																																7.56438	0.23316
																																7.55886	0.23388
																																7.55336	0.23455
																																7.54786	0.23515
																																7.54237	0.2357
																																7.53689	0.23629
																																7.53142	0.23697
																																7.52595	0.23776
																																7.52049	0.23863
																																7.51505	0.23948
																																7.5096	0.24026
																																7.50417	0.24094
																																7.49874	0.24154
																																7.49333	0.24215
																																7.48792	0.24287
																																7.48251	0.24374
																																7.47712	0.24473
																																7.47173	0.24571
																																7.46635	0.24657
																																7.46098	0.24727
																																7.45561	0.24789
																																7.45026	0.24853
																																7.44491	0.2493
																																7.43957	0.2502
																																7.43424	0.25119
																																7.42891	0.25216
																																7.4236	0.25307
																																7.41828	0.25388
																																7.41298	0.25463
																																7.40769	0.25539
																																7.4024	0.25624
																																7.39712	0.25719
																																7.39185	0.2582
																																7.38658	0.25918
																																7.38133	0.26005
																																7.37607	0.26078
																																7.37083	0.26138
																																7.3656	0.26192
																																7.36037	0.2625
																																7.35515	0.26319
																																7.34994	0.264
																																7.34473	0.26488
																																7.33954	0.26578
																																7.33434	0.26667
																																7.32916	0.26759
																																7.32398	0.26859
																																7.31882	0.26971
																																7.31365	0.2709
																																7.3085	0.27208
																																7.30335	0.27316
																																7.29822	0.27407
																																7.29308	0.27483
																																7.28796	0.27552
																																7.28284	0.27628
																																7.27773	0.27721
																																7.27262	0.27834
																																7.26753	0.27963
																																7.26244	0.28094
																																7.25736	0.28217
																																7.25228	0.28325
																																7.24721	0.28421
																																7.24215	0.28512
																																7.2371	0.28605
																																7.23205	0.28706
																																7.22701	0.28815
																																7.22198	0.28928
																																7.21695	0.29038
																																7.21193	0.2914
																																7.20692	0.29234
																																7.20192	0.29323
																																7.19692	0.29414
																																7.19193	0.29507
																																7.18694	0.29599
																																7.18197	0.29687
																																7.177	0.29767
																																7.17203	0.29841
																																7.16708	0.29916
																																7.16213	0.30001
																																7.15719	0.30106
																																7.15225	0.3023
																																7.14732	0.30366
																																7.1424	0.30504
																																7.13748	0.30633
																																7.13257	0.3075
																																7.12767	0.30861
																																7.12278	0.30975
																																7.11789	0.31101
																																7.11301	0.31244
																																7.10813	0.31399
																																7.10326	0.31556
																																7.0984	0.31702
																																7.09354	0.31832
																																7.08869	0.31945
																																7.08385	0.32047
																																7.07902	0.32146
																																7.07419	0.32248
																																7.06937	0.32355
																																7.06455	0.32467
																																7.05974	0.32578
																																7.05494	0.3269
																																7.05014	0.32806
																																7.04535	0.32932
																																7.04057	0.33075
																																7.03579	0.33231
																																7.03102	0.33391
																																7.02626	0.33542
																																7.02151	0.33678
																																7.01675	0.33801
																																7.01201	0.33918
																																7.00727	0.3404
																																7.00254	0.34175
																																6.99781	0.34327
																																6.9931	0.3449
																																6.98838	0.34654
																																6.98368	0.34811
																																6.97898	0.34957
																																6.97428	0.35095
																																6.9696	0.35236
																																6.96492	0.35393
																																6.96024	0.35569
																																6.95557	0.35756
																																6.95091	0.35938
																																6.94626	0.36103
																																6.94161	0.36247
																																6.93696	0.36373
																																6.93233	0.36492
																																6.9277	0.36617
																																6.92307	0.36754
																																6.91845	0.36906
																																6.91384	0.37067
																																6.90924	0.37229
																																6.90464	0.37385
																																6.90004	0.37534
																																6.89545	0.3768
																																6.89087	0.37829
																																6.88629	0.37987
																																6.88173	0.38152
																																6.87716	0.38323
																																6.87261	0.38498
																																6.86806	0.38672
																																6.86351	0.38843
																																6.85897	0.3901
																																6.85444	0.39181
																																6.84991	0.3936
																																6.84539	0.39546
																																6.84087	0.39729
																																6.83636	0.39904
																																6.83186	0.40071
																																6.82736	0.40232
																																6.82287	0.40393
																																6.81838	0.40558
																																6.8139	0.40726
																																6.80943	0.40894
																																6.80496	0.41059
																																6.8005	0.41219
																																6.79605	0.41381
																																6.79159	0.41556
																																6.78715	0.41753
																																6.78271	0.41975
																																6.77827	0.42213
																																6.77385	0.42455
																																6.76943	0.4269
																																6.76501	0.42908
																																6.7606	0.43107
																																6.7562	0.43291
																																6.7518	0.43465
																																6.74741	0.43631
																																6.74302	0.43793
																																6.73864	0.4395
																																6.73426	0.44104
																																6.72989	0.4426
																																6.72553	0.44427
																																6.72117	0.44617
																																6.71681	0.44838
																																6.71247	0.45087
																																6.70813	0.45354
																																6.70379	0.45624
																																6.69946	0.45884
																																6.69513	0.46126
																																6.69081	0.46349
																																6.6865	0.46563
																																6.68219	0.46783
																																6.67789	0.47016
																																6.67359	0.47259
																																6.6693	0.47495
																																6.66501	0.47705
																																6.66073	0.47878
																																6.65646	0.48009
																																6.65219	0.48102
																																6.64792	0.48184
																																6.64367	0.48311
																																6.63941	0.48545
																																6.63516	0.48898
																																6.63092	0.49294
																																6.62669	0.4964
																																6.62245	0.49902
																																6.61823	0.50099
																																6.61401	0.50261
																																6.60979	0.50414
																																6.60558	0.50573
																																6.60137	0.50749
																																6.59718	0.50943
																																6.59298	0.51157
																																6.58879	0.5139
																																6.58461	0.51647
																																6.58043	0.51935
																																6.57626	0.52259
																																6.57209	0.52608
																																6.56793	0.52953
																																6.56377	0.53265
																																6.55962	0.53529
																																6.55547	0.5375
																																6.55133	0.53945
																																6.5472	0.54132
																																6.54307	0.54328
																																6.53894	0.54538
																																6.53482	0.54762
																																6.53071	0.54995
																																6.5266	0.55229
																																6.52249	0.5546
																																6.51839	0.55685
																																6.5143	0.55903
																																6.51021	0.56119
																																6.50613	0.56339
																																6.50204	0.56578
																																6.49797	0.5686
																																6.4939	0.572
																																6.48984	0.57587
																																6.48578	0.5797
																																6.48173	0.58306
																																6.47768	0.58589
																																6.47364	0.58833
																																6.46959	0.59056
																																6.46556	0.59266
																																6.46153	0.5947
																																6.45751	0.59674
																																6.45349	0.59883
																																6.44948	0.60101
																																6.44547	0.60329
																																6.44147	0.60562
																																6.43747	0.60792
																																6.43347	0.61016
																																6.42949	0.61235
																																6.4255	0.61472
																																6.42152	0.61761
																																6.41755	0.62121
																																6.41358	0.62526
																																6.40962	0.62921
																																6.40566	0.6326
																																6.4017	0.63529
																																6.39776	0.63737
																																6.39381	0.63911
																																6.38987	0.64079
																																6.38594	0.64265
																																6.38201	0.64485
																																6.37808	0.64742
																																6.37416	0.65025
																																6.37025	0.65318
																																6.36634	0.65607
																																6.36243	0.65887
																																6.35853	0.66163
																																6.35463	0.66447
																																6.35074	0.66745
																																6.34686	0.67059
																																6.34297	0.67374
																																6.3391	0.67673
																																6.33522	0.67943
																																6.33136	0.68183
																																6.32749	0.68403
																																6.32363	0.68617
																																6.31978	0.68834
																																6.31593	0.69061
																																6.31209	0.69298
																																6.30825	0.69541
																																6.30441	0.69787
																																6.30059	0.70032
																																6.29676	0.70276
																																6.29294	0.70522
																																6.28912	0.70771
																																6.28531	0.71024
																																6.2815	0.71279
																																6.2777	0.71531
																																6.2739	0.7178
																																6.27011	0.72025
																																6.26632	0.72266
																																6.26254	0.72508
																																6.25876	0.7275
																																6.25498	0.72993
																																6.25121	0.73232
																																6.24745	0.73467
																																6.24369	0.73696
																																6.23993	0.73921
																																6.23618	0.74147
																																6.23243	0.74378
																																6.22869	0.74613
																																6.22495	0.74851
																																6.22121	0.75085
																																6.21748	0.75311
																																6.21376	0.75525
																																6.21004	0.7573
																																6.20632	0.75931
																																6.20261	0.76134
																																6.1989	0.76346
																																6.1952	0.76567
																																6.1915	0.76799
																																6.1878	0.77033
																																6.18412	0.77261
																																6.18043	0.77475
																																6.17675	0.77673
																																6.17307	0.77857
																																6.1694	0.78032
																																6.16573	0.78205
																																6.16207	0.78383
																																6.15841	0.78568
																																6.15476	0.7876
																																6.15111	0.78958
																																6.14746	0.79154
																																6.14382	0.79342
																																6.14018	0.79516
																																6.13655	0.79675
																																6.13291	0.79819
																																6.12929	0.79953
																																6.12567	0.80085
																																6.12206	0.8023
																																6.11844	0.80402
																																6.11484	0.80607
																																6.11123	0.80831
																																6.10763	0.81047
																																6.10404	0.81236
																																6.10045	0.81391
																																6.09686	0.81521
																																6.09328	0.81635
																																6.0897	0.81743
																																6.08613	0.81851
																																6.08256	0.81966
																																6.07899	0.82092
																																6.07543	0.8223
																																6.07187	0.82376
																																6.06832	0.82525
																																6.06477	0.82675
																																6.06123	0.82826
																																6.05769	0.82981
																																6.05415	0.83139
																																6.05062	0.83292
																																6.04709	0.83433
																																6.04357	0.83555
																																6.04005	0.83657
																																6.03653	0.83743
																																6.03302	0.8382
																																6.02951	0.83894
																																6.02601	0.83968
																																6.02251	0.84043
																																6.01901	0.84118
																																6.01552	0.84192
																																6.01204	0.84265
																																6.00855	0.84338
																																6.00507	0.8441
																																6.0016	0.84481
																																5.99813	0.84549
																																5.99466	0.84611
																																5.9912	0.84668
																																5.98774	0.84722
																																5.98428	0.84776
																																5.98083	0.84833
																																5.97738	0.84895
																																5.97394	0.84958
																																5.9705	0.85016
																																5.96707	0.85064
																																5.96363	0.851
																																5.96021	0.85127
																																5.95678	0.8515
																																5.95337	0.85174
																																5.94995	0.852
																																5.94654	0.85227
																																5.94313	0.85248
																																5.93973	0.85254
																																5.93632	0.85246
																																5.93293	0.85229
																																5.92954	0.85217
																																5.92615	0.85214
																																5.92276	0.85219
																																5.91938	0.85229
																																5.91601	0.85239
																																5.91264	0.85244
																																5.90926	0.85243
																																5.9059	0.85232
																																5.90254	0.85213
																																5.89918	0.85187
																																5.89583	0.85153
																																5.89248	0.85106
																																5.88913	0.85038
																																5.88579	0.84945
																																5.88245	0.84836
																																5.87912	0.84729
																																5.87579	0.84637
																																5.87246	0.84562
																																5.86913	0.84498
																																5.86581	0.84435
																																5.8625	0.84368
																																5.85919	0.84296
																																5.85588	0.84222
																																5.85257	0.84154
																																5.84927	0.84095
																																5.84598	0.84047
																																5.84268	0.84003
																																5.83939	0.83954
																																5.83611	0.83884
																																5.83283	0.83776
																																5.82954	0.83616
																																5.82627	0.83415
																																5.823	0.83205
																																5.81973	0.83023
																																5.81647	0.82882
																																5.81321	0.82774
																																5.80995	0.82677
																																5.8067	0.8258
																																5.80345	0.82476
																																5.8002	0.82368
																																5.79696	0.8226
																																5.79372	0.82155
																																5.79049	0.82054
																																5.78725	0.81952
																																5.78403	0.81841
																																5.7808	0.81709
																																5.77758	0.81548
																																5.77437	0.81355
																																5.77115	0.81138
																																5.76794	0.80916
																																5.76474	0.80706
																																5.76153	0.80512
																																5.75834	0.80328
																																5.75514	0.80146
																																5.75195	0.79962
																																5.74876	0.7978
																																5.74557	0.79604
																																5.74239	0.7944
																																5.73921	0.79285
																																5.73604	0.79131
																																5.73287	0.78967
																																5.7297	0.78784
																																5.72654	0.78576
																																5.72338	0.78342
																																5.72022	0.78093
																																5.71707	0.77841
																																5.71392	0.77599
																																5.71077	0.77375
																																5.70763	0.77168
																																5.70449	0.76972
																																5.70135	0.76785
																																5.69822	0.76602
																																5.69509	0.7642
																																5.69197	0.76236
																																5.68884	0.76042
																																5.68572	0.75832
																																5.68261	0.756
																																5.6795	0.75352
																																5.67639	0.751
																																5.67328	0.74859
																																5.67018	0.74641
																																5.66708	0.74449
																																5.66399	0.74273
																																5.6609	0.741
																																5.65781	0.7391
																																5.65472	0.73687
																																5.65164	0.73422
																																5.64856	0.73118
																																5.64549	0.72794
																																5.64242	0.72476
																																5.63935	0.72188
																																5.63628	0.71934
																																5.63322	0.71706
																																5.63016	0.71491
																																5.62711	0.71279
																																5.62406	0.71063
																																5.62101	0.70842
																																5.61796	0.70616
																																5.61492	0.70383
																																5.61188	0.70143
																																5.60885	0.69898
																																5.60582	0.69653
																																5.60279	0.69415
																																5.59976	0.69187
																																5.59674	0.68971
																																5.59372	0.6876
																																5.59071	0.68545
																																5.58769	0.68309
																																5.58469	0.68043
																																5.58168	0.67745
																																5.57868	0.67429
																																5.57568	0.67119
																																5.57268	0.66837
																																5.56969	0.66588
																																5.5667	0.66361
																																5.56371	0.66137
																																5.56073	0.65899
																																5.55775	0.65638
																																5.55477	0.65359
																																5.5518	0.65078
																																5.54883	0.64813
																																5.54586	0.64573
																																5.5429	0.64358
																																5.53994	0.64152
																																5.53698	0.63942
																																5.53403	0.63713
																																5.53107	0.63462
																																5.52812	0.63194
																																5.52518	0.6292
																																5.52224	0.62651
																																5.5193	0.62394
																																5.51636	0.62148
																																5.51343	0.61908
																																5.5105	0.6167
																																5.50757	0.61432
																																5.50465	0.61196
																																5.50173	0.60966
																																5.49881	0.60742
																																5.4959	0.60523
																																5.49299	0.60301
																																5.49008	0.6007
																																5.48718	0.59824
																																5.48427	0.59561
																																5.48137	0.59288
																																5.47848	0.5901
																																5.47559	0.58735
																																5.4727	0.58463
																																5.46981	0.58195
																																5.46693	0.57929
																																5.46405	0.57667
																																5.46117	0.57417
																																5.45829	0.57185
																																5.45542	0.56977
																																5.45256	0.56788
																																5.44969	0.56612
																																5.44683	0.56437
																																5.44397	0.56253
																																5.44111	0.56056
																																5.43826	0.55847
																																5.43541	0.55627
																																5.43256	0.55402
																																5.42972	0.55173
																																5.42688	0.54936
																																5.42404	0.54685
																																5.4212	0.54417
																																5.41837	0.54139
																																5.41554	0.53865
																																5.41271	0.53612
																																5.40989	0.53389
																																5.40707	0.53194
																																5.40425	0.53018
																																5.40144	0.52846
																																5.39863	0.52665
																																5.39582	0.5247
																																5.39301	0.52262
																																5.39021	0.52046
																																5.38741	0.51833
																																5.38461	0.51628
																																5.38182	0.51432
																																5.37902	0.5124
																																5.37624	0.51047
																																5.37345	0.50849
																																5.37067	0.50646
																																5.36789	0.5044
																																5.36511	0.50235
																																5.36234	0.5003
																																5.35957	0.4982
																																5.3568	0.49596
																																5.35403	0.49353
																																5.35127	0.49094
																																5.34851	0.48838
																																5.34575	0.48607
																																5.343	0.48414
																																5.34025	0.48258
																																5.3375	0.48123
																																5.33475	0.47991
																																5.33201	0.47846
																																5.32927	0.47681
																																5.32654	0.47499
																																5.3238	0.47308
																																5.32107	0.47121
																																5.31834	0.46944
																																5.31561	0.46777
																																5.31289	0.46614
																																5.31017	0.46444
																																5.30745	0.46263
																																5.30474	0.4607
																																5.30202	0.45872
																																5.29932	0.45676
																																5.29661	0.4549
																																5.29391	0.45315
																																5.2912	0.45145
																																5.28851	0.44976
																																5.28581	0.44803
																																5.28312	0.44629
																																5.28043	0.4446
																																5.27774	0.443
																																5.27506	0.44151
																																5.27238	0.4401
																																5.2697	0.43868
																																5.26702	0.43721
																																5.26435	0.43565
																																5.26167	0.43406
																																5.25901	0.43248
																																5.25634	0.43098
																																5.25368	0.42957
																																5.25102	0.42822
																																5.24836	0.42684
																																5.24571	0.42535
																																5.24305	0.42374
																																5.2404	0.42203
																																5.23776	0.42034
																																5.23511	0.41875
																																5.23247	0.41731
																																5.22984	0.41601
																																5.2272	0.41474
																																5.22456	0.41342
																																5.22193	0.41199
																																5.2193	0.41046
																																5.21668	0.4089
																																5.21406	0.40739
																																5.21144	0.40598
																																5.20882	0.40465
																																5.2062	0.40335
																																5.20359	0.40201
																																5.20098	0.4006
																																5.19838	0.39916
																																5.19577	0.39777
																																5.19317	0.3965
																																5.19057	0.39537
																																5.18798	0.39434
																																5.18538	0.39333
																																5.18279	0.39224
																																5.1802	0.39105
																																5.17762	0.38976
																																5.17503	0.38846
																																5.17245	0.38722
																																5.16987	0.38607
																																5.1673	0.38501
																																5.16472	0.38396
																																5.16215	0.38285
																																5.15958	0.38163
																																5.15702	0.38031
																																5.15445	0.37895
																																5.15189	0.37762
																																5.14934	0.37639
																																5.14678	0.37527
																																5.14423	0.3742
																																5.14168	0.37315
																																5.13913	0.37208
																																5.13658	0.37101
																																5.13404	0.36998
																																5.1315	0.36902
																																5.12896	0.36813
																																5.12643	0.36728
																																5.12389	0.36642
																																5.12136	0.36548
																																5.11884	0.36445
																																5.11631	0.36335
																																5.11379	0.36225
																																5.11127	0.3612
																																5.10875	0.36026
																																5.10624	0.35939
																																5.10372	0.35854
																																5.10121	0.35767
																																5.0987	0.35674
																																5.0962	0.35575
																																5.09369	0.35475
																																5.09119	0.35378
																																5.0887	0.35287
																																5.0862	0.35199
																																5.08371	0.35112
																																5.08122	0.35019
																																5.07873	0.34921
																																5.07624	0.34822
																																5.07376	0.34727
																																5.07128	0.34642
																																5.0688	0.34567
																																5.06632	0.34499
																																5.06385	0.34431
																																5.06138	0.34356
																																5.05891	0.34273
																																5.05644	0.34184
																																5.05398	0.34095
																																5.05152	0.34012
																																5.04906	0.33938
																																5.0466	0.33872
																																5.04414	0.33808
																																5.04169	0.33741
																																5.03924	0.33667
																																5.0368	0.33589
																																5.03435	0.3351
																																5.03191	0.33435
																																5.02947	0.33366
																																5.02703	0.333
																																5.02459	0.33233
																																5.02216	0.33158
																																5.01973	0.33077
																																5.0173	0.32992
																																5.01487	0.32912
																																5.01245	0.32842
																																5.01003	0.32784
																																5.00761	0.32733
																																5.00519	0.32683
																																5.00278	0.32626
																																5.00037	0.32561
																																4.99796	0.3249
																																4.99555	0.32419
																																4.99314	0.32354
																																4.99074	0.32298
																																4.98834	0.32248
																																4.98594	0.32199
																																4.98355	0.32145
																																4.98115	0.32085
																																4.97876	0.3202
																																4.97637	0.31955
																																4.97399	0.31897
																																4.9716	0.31846
																																4.96922	0.31802
																																4.96684	0.3176
																																4.96446	0.31712
																																4.96209	0.31657
																																4.95971	0.31597
																																4.95734	0.31535
																																4.95497	0.31479
																																4.95261	0.3143
																																4.95025	0.31387
																																4.94788	0.31345
																																4.94552	0.31299
																																4.94317	0.31247
																																4.94081	0.31191
																																4.93846	0.31134
																																4.93611	0.31083
																																4.93376	0.3104
																																4.93141	0.31002
																																4.92907	0.30965
																																4.92673	0.30924
																																4.92439	0.30878
																																4.92205	0.30828
																																4.91972	0.3078
																																4.91738	0.30737
																																4.91505	0.30702
																																4.91273	0.30674
																																4.9104	0.30646
																																4.90807	0.30615
																																4.90575	0.30576
																																4.90343	0.30532
																																4.90112	0.30487
																																4.8988	0.30447
																																4.89649	0.30412
																																4.89418	0.30382
																																4.89187	0.30352
																																4.88956	0.30319
																																4.88726	0.3028
																																4.88496	0.30237
																																4.88266	0.30196
																																4.88036	0.30161
																																4.87806	0.30133
																																4.87577	0.30111
																																4.87348	0.3009
																																4.87119	0.30065
																																4.8689	0.30034
																																4.86662	0.29999
																																4.86433	0.29965
																																4.86205	0.29937
																																4.85978	0.29916
																																4.8575	0.299
																																4.85522	0.29886
																																4.85295	0.29868
																																4.85068	0.29844
																																4.84842	0.29815
																																4.84615	0.29786
																																4.84389	0.2976
																																4.84163	0.29741
																																4.83937	0.29725
																																4.83711	0.2971
																																4.83485	0.29691
																																4.8326	0.29668
																																4.83035	0.29642
																																4.8281	0.29618
																																4.82585	0.296
																																4.82361	0.29589
																																4.82137	0.29584
																																4.81913	0.2958
																																4.81689	0.29571
																																4.81465	0.29557
																																4.81242	0.29539
																																4.81019	0.29522
																																4.80796	0.29509
																																4.80573	0.29504
																																4.8035	0.29504
																																4.80128	0.29506
																																4.79906	0.29505
																																4.79684	0.29499
																																4.79462	0.2949
																																4.7924	0.29482
																																4.79019	0.29479
																																4.78798	0.29482
																																4.78577	0.2949
																																4.78356	0.29498
																																4.78136	0.29502
																																4.77915	0.29501
																																4.77695	0.29496
																																4.77475	0.29493
																																4.77255	0.29495
																																4.77036	0.29505
																																4.76817	0.2952
																																4.76597	0.29536
																																4.76379	0.29548
																																4.7616	0.29556
																																4.75941	0.29559
																																4.75723	0.29564
																																4.75505	0.29573
																																4.75287	0.29588
																																4.75069	0.29609
																																4.74852	0.29631
																																4.74634	0.29649
																																4.74417	0.29662
																																4.742	0.29673
																																4.73984	0.29684
																																4.73767	0.29701
																																4.73551	0.29724
																																4.73335	0.29752
																																4.73119	0.2978
																																4.72903	0.29803
																																4.72687	0.2982
																																4.72472	0.29833
																																4.72257	0.29845
																																4.72042	0.29861
																																4.71827	0.29884
																																4.71613	0.29912
																																4.71398	0.29941
																																4.71184	0.29968
																																4.7097	0.29989
																																4.70756	0.30008
																																4.70543	0.30026
																																4.70329	0.30049
																																4.70116	0.30078
																																4.69903	0.30112
																																4.6969	0.30146
																																4.69478	0.30177
																																4.69265	0.30203
																																4.69053	0.30227
																																4.68841	0.30251
																																4.68629	0.30279
																																4.68417	0.30313
																																4.68206	0.30351
																																4.67995	0.30388
																																4.67784	0.30421
																																4.67573	0.30448
																																4.67362	0.3047
																																4.67151	0.30493
																																4.66941	0.30521
																																4.66731	0.30554
																																4.66521	0.30592
																																4.66311	0.30632
																																4.66102	0.30668
																																4.65892	0.30699
																																4.65683	0.30727
																																4.65474	0.30755
																																4.65265	0.30787
																																4.65057	0.30824
																																4.64848	0.30866
																																4.6464	0.30907
																																4.64432	0.30946
																																4.64224	0.3098
																																4.64016	0.3101
																																4.63809	0.31042
																																4.63601	0.31077
																																4.63394	0.31117
																																4.63187	0.31162
																																4.62981	0.31207
																																4.62774	0.31248
																																4.62567	0.31284
																																4.62361	0.31316
																																4.62155	0.31347
																																4.61949	0.31383
																																4.61744	0.31423
																																4.61538	0.31467
																																4.61333	0.31513
																																4.61128	0.31555
																																4.60923	0.31592
																																4.60718	0.31627
																																4.60513	0.31661
																																4.60309	0.31699
																																4.60105	0.31741
																																4.59901	0.31788
																																4.59697	0.31834
																																4.59493	0.31878
																																4.5929	0.31917
																																4.59086	0.31952
																																4.58883	0.31988
																																4.5868	0.32028
																																4.58478	0.32072
																																4.58275	0.32121
																																4.58072	0.32169
																																4.5787	0.32215
																																4.57668	0.32256
																																4.57466	0.32293
																																4.57265	0.3233
																																4.57063	0.3237
																																4.56862	0.32415
																																4.56661	0.32464
																																4.56459	0.32513
																																4.56259	0.32558
																																4.56058	0.326
																																4.55858	0.32638
																																4.55657	0.32677
																																4.55457	0.32718
																																4.55257	0.32764
																																4.55058	0.32813
																																4.54858	0.32863
																																4.54658	0.3291
																																4.54459	0.32952
																																4.5426	0.32992
																																4.54061	0.33032
																																4.53863	0.33075
																																4.53664	0.33122
																																4.53466	0.33174
																																4.53267	0.33225
																																4.53069	0.33274
																																4.52872	0.33318
																																4.52674	0.33358
																																4.52476	0.33399
																																4.52279	0.33443
																																4.52082	0.3349
																																4.51885	0.33542
																																4.51688	0.33593
																																4.51492	0.33641
																																4.51295	0.33685
																																4.51099	0.33727
																																4.50903	0.33768
																																4.50707	0.33813
																																4.50511	0.33863
																																4.50315	0.33915
																																4.5012	0.33969
																																4.49925	0.34019
																																4.49729	0.34065
																																4.49535	0.34109
																																4.4934	0.34152
																																4.49145	0.34197
																																4.48951	0.34247
																																4.48756	0.343
																																4.48562	0.34353
																																4.48368	0.34403
																																4.48175	0.34449
																																4.47981	0.34492
																																4.47788	0.34534
																																4.47594	0.34579
																																4.47401	0.34629
																																4.47208	0.34682
																																4.47015	0.34735
																																4.46823	0.34786
																																4.46631	0.34832
																																4.46438	0.34876
																																4.46246	0.34919
																																4.46054	0.34965
																																4.45862	0.35015
																																4.45671	0.35069
																																4.4548	0.35122
																																4.45288	0.35173
																																4.45097	0.35219
																																4.44906	0.35261
																																4.44715	0.35304
																																4.44525	0.35349
																																4.44334	0.35399
																																4.44144	0.35452
																																4.43954	0.35506
																																4.43764	0.35557
																																4.43574	0.35604
																																4.43384	0.35647
																																4.43195	0.3569
																																4.43006	0.35736
																																4.42816	0.35786
																																4.42628	0.35838
																																4.42439	0.35891
																																4.4225	0.35941
																																4.42061	0.35986
																																4.41873	0.36029
																																4.41685	0.36071
																																4.41497	0.36115
																																4.41309	0.36165
																																4.41121	0.36217
																																4.40934	0.3627
																																4.40746	0.36321
																																4.40559	0.36368
																																4.40372	0.36412
																																4.40185	0.36456
																																4.39998	0.36503
																																4.39812	0.36555
																																4.39625	0.3661
																																4.39439	0.36665
																																4.39253	0.36717
																																4.39067	0.36765
																																4.38881	0.36809
																																4.38695	0.36852
																																4.3851	0.36897
																																4.38325	0.36945
																																4.3814	0.36995
																																4.37954	0.37045
																																4.3777	0.37092
																																4.37585	0.37136
																																4.374	0.37178
																																4.37216	0.37222
																																4.37032	0.37268
																																4.36848	0.3732
																																4.36664	0.37375
																																4.3648	0.37431
																																4.36296	0.37485
																																4.36113	0.37535
																																4.35929	0.37582
																																4.35746	0.37628
																																4.35563	0.37677
																																4.3538	0.3773
																																4.35198	0.37785
																																4.35015	0.3784
																																4.34833	0.37892
																																4.34651	0.37939
																																4.34468	0.37982
																																4.34287	0.38025
																																4.34105	0.3807
																																4.33923	0.38119
																																4.33742	0.38172
																																4.3356	0.38227
																																4.33379	0.3828
																																4.33198	0.38329
																																4.33017	0.38375
																																4.32836	0.3842
																																4.32656	0.38468
																																4.32475	0.3852
																																4.32295	0.38574
																																4.32115	0.38626
																																4.31935	0.38672
																																4.31755	0.38708
																																4.31576	0.38735
																																4.31396	0.3876
																																4.31217	0.38787
																																4.31037	0.38823
																																4.30858	0.38868
																																4.3068	0.3892
																																4.30501	0.38974
																																4.30322	0.39027
																																4.30144	0.39077
																																4.29965	0.39129
																																4.29787	0.39184
																																4.29609	0.39244
[truncated: 1,301 more rows]

## Sheet: Data interpolation processing
3	0.202628	Ge/ZnS	3	0.279724	Al2O3/Ge/ZnS/GST/Ni	3	0.192119	Ge/ZnS/Pt/Ag/Au/SiO2	3	0.26013	ITO/ZnS	3	0.3531	Au-Si3N4-Au	3	0.85	Si/GST/Au	3	0.69	Au- Si3N4-ITO	3	0.138	VO2/SiO2/ITO	3	0.169011	Ge/SiO2/Pt/ZnS/Au	3	0.13	OPA/Cu	3	0.616711	This Work
3.05	0.29854		3.05	0.288184		3.05	0.186805		3.05	0.24187		3.05	0.318621		3.05	0.86757		3.05	0.65		3.05	0.141		3.05	0.229033		3.05	0.128601		3.05	0.605894
3.1	0.508192		3.1	0.298296		3.1	0.181491		3.1	0.232597		3.1	0.287466		3.1	0.965915		3.1	0.638991		3.1	0.1444		3.1	0.289055		3.1	0.127212		3.1	0.598663
3.15	0.306465		3.15	0.324402		3.15	0.176178		3.15	0.223325		3.15	0.266779		3.15	0.991525		3.15	0.596661		3.15	0.147849		3.15	0.349077		3.15	0.12635		3.15	0.592681
3.2	0.183369		3.2	0.341028		3.2	0.163283		3.2	0.214052		3.2	0.249304		3.2	0.993545		3.2	0.561409		3.2	0.151298		3.2	0.317216		3.2	0.125489		3.2	0.586257
3.25	0.335663		3.25	0.316484		3.25	0.147621		3.25	0.207354		3.25	0.239822		3.25	0.995565		3.25	0.530188		3.25	0.154746		3.25	0.241964		3.25	0.124628		3.25	0.57881
3.3	0.246237		3.3	0.291939		3.3	0.13196		3.3	0.208182		3.3	0.23034		3.3	0.989771		3.3	0.504075		3.3	0.158195		3.3	0.18279		3.3	0.123766		3.3	0.571039
3.35	0.137455		3.35	0.253639		3.35	0.116299		3.35	0.20901		3.35	0.220171		3.35	0.87176		3.35	0.478802		3.35	0.161644		3.35	0.129202		3.35	0.122905		3.35	0.565035
3.4	0.0313744		3.4	0.209689		3.4	0.101595		3.4	0.209838		3.4	0.206379		3.4	0.710255		3.4	0.455931		3.4	0.165093		3.4	0.0756136		3.4	0.122043		3.4	0.561053
3.45	0.0250453		3.45	0.192975		3.45	0.0951423		3.45	0.210666		3.45	0.192588		3.45	0.603056		3.45	0.433428		3.45	0.168542		3.45	0.0550582		3.45	0.120357		3.45	0.558921
3.5	0.0187162		3.5	0.193543		3.5	0.08869		3.5	0.211494		3.5	0.183751		3.5	0.51748		3.5	0.424262		3.5	0.172167		3.5	0.0487872		3.5	0.117838		3.5	0.556525
3.55	0.0123871		3.55	0.194112		3.55	0.0822376		3.55	0.212321		3.55	0.176044		3.55	0.431904		3.55	0.420145		3.55	0.176837		3.55	0.0425163		3.55	0.115318		3.55	0.552685
3.6	0.006058		3.6	0.194681		3.6	0.0783011		3.6	0.213792		3.6	0.168337		3.6	0.346328		3.6	0.416027		3.6	0.181508		3.6	0.0400316		3.6	0.112799		3.6	0.546264
3.65	-0.000271098		3.65	0.19525		3.65	0.0804622		3.65	0.216442		3.65	0.16063		3.65	0.316538		3.65	0.41191		3.65	0.186178		3.65	0.0437941		3.65	0.11028		3.65	0.538127
3.7	0.00879765		3.7	0.195819		3.7	0.0826232		3.7	0.219091		3.7	0.152923		3.7	0.294533		3.7	0.409788		3.7	0.191014		3.7	0.0475567		3.7	0.107761		3.7	0.529008
3.75	0.0285761		3.75	0.195384		3.75	0.0885073		3.75	0.22174		3.75	0.145216		3.75	0.272528		3.75	0.41366		3.75	0.196187		3.75	0.0513193		3.75	0.105769		3.75	0.519555
3.8	0.0686087		3.8	0.188238		3.8	0.103203		3.8	0.22439		3.8	0.159838		3.8	0.250522		3.8	0.417532		3.8	0.201361		3.8	0.0550818		3.8	0.105408		3.8	0.510187
3.85	0.283284		3.85	0.181091		3.85	0.117898		3.85	0.227039		3.85	0.205226		3.85	0.239272		3.85	0.421404		3.85	0.206534		3.85	0.0588444		3.85	0.105047		3.85	0.500738
3.9	0.315584		3.9	0.173944		3.9	0.14434		3.9	0.229688		3.9	0.227864		3.9	0.245002		3.9	0.425276		3.9	0.211707		3.9	0.0834585		3.9	0.104687		3.9	0.491243
3.95	0.507039		3.95	0.166798		3.95	0.197934		3.95	0.233117		3.95	0.249131		3.95	0.250733		3.95	0.429148		3.95	0.21688		3.95	0.111963		3.95	0.104326		3.95	0.481308
4	0.553554		4	0.160924		4	0.251529		4	0.236649		4	0.244534		4	0.256463		4	0.43302		4	0.222054		4	0.140467		4	0.103965		4	0.470459
4.05	0.406628		4.05	0.155485		4.05	0.377688		4.05	0.240182		4.05	0.239937		4.05	0.262194		4.05	0.426595		4.05	0.227227		4.05	0.288456		4.05	0.103604		4.05	0.458497
4.1	0.259703		4.1	0.150046		4.1	0.640333		4.1	0.243714		4.1	0.23534		4.1	0.267925		4.1	0.416888		4.1	0.232744		4.1	0.493275		4.1	0.103542		4.1	0.445816
4.15	0.163344		4.15	0.126677		4.15	0.804697		4.15	0.247247		4.15	0.225198		4.15	0.273655		4.15	0.407181		4.15	0.24333		4.15	0.735752		4.15	0.103485		4.15	0.43237
4.2	0.0792081		4.2	0.0954388		4.2	0.84712		4.2	0.250779		4.2	0.210027		4.2	0.280191		4.2	0.397473		4.2	0.253916		4.2	0.978229		4.2	0.103428		4.2	0.418942
4.25	0.0655678		4.25	0.0772518		4.25	0.620496		4.25	0.255244		4.25	0.190925		4.25	0.28987		4.25	0.387766		4.25	0.264502		4.25	0.747229		4.25	0.103371		4.25	0.403988
4.3	0.0519275		4.3	0.106259		4.3	0.400537		4.3	0.261039		4.3	0.168859		4.3	0.299548		4.3	0.37407		4.3	0.275089		4.3	0.477578		4.3	0.103314		4.3	0.391188
4.35	0.0382872		4.35	0.135266		4.35	0.225313		4.35	0.266834		4.35	0.156981		4.35	0.309226		4.35	0.359921		4.35	0.285675		4.35	0.231263		4.35	0.103258		4.35	0.378443
4.4	0.0246469		4.4	0.141818		4.4	0.151212		4.4	0.27263		4.4	0.151465		4.4	0.318904		4.4	0.345771		4.4	0.296473		4.4	0.133268		4.4	0.103152		4.4	0.365025
4.45	0.0110066		4.45	0.146653		4.45	0.116029		4.45	0.278425		4.45	0.152788		4.45	0.328583		4.45	0.342939		4.45	0.307682		4.45	0.0893118		4.45	0.103017		4.45	0.352403
4.5	0.013404		4.5	0.151487		4.5	0.0808473		4.5	0.284221		4.5	0.157615		4.5	0.343904		4.5	0.341432		4.5	0.31889		4.5	0.0673634		4.5	0.102882		4.5	0.339998
4.55	0.0192334		4.55	0.156322		4.55	0.0466255		4.55	0.290016		4.55	0.162442		4.55	0.360495		4.55	0.339926		4.55	0.330099		4.55	0.0455084		4.55	0.102747		4.55	0.328275
4.6	0.0250629		4.6	0.161156		4.6	0.0430244		4.6	0.296234		4.6	0.167269		4.6	0.377087		4.6	0.33842		4.6	0.34238		4.6	0.0384014		4.6	0.102612		4.6	0.317652
4.65	0.0432258		4.65	0.165991		4.65	0.0406472		4.65	0.302857		4.65	0.16186		4.65	0.393678		4.65	0.336913		4.65	0.355627		4.65	0.0312943		4.65	0.102478		4.65	0.308355
4.7	0.0814641		4.7	0.170825		4.7	0.0382701		4.7	0.309481		4.7	0.153083		4.7	0.410269		4.7	0.335407		4.7	0.368873		4.7	0.0241872		4.7	0.102519		4.7	0.300965
4.75	0.119702		4.75	0.178348		4.75	0.0358929		4.75	0.316104		4.75	0.144307		4.75	0.426861		4.75	0.3339		4.75	0.382293		4.75	0.0170801		4.75	0.102784		4.75	0.29616
4.8	0.157941		4.8	0.192046		4.8	0.0579229		4.8	0.322727		4.8	0.135531		4.8	0.450217		4.8	0.336167		4.8	0.401508		4.8	0.0345275		4.8	0.103049		4.8	0.295054
4.85	0.194827		4.85	0.205744		4.85	0.0959576		4.85	0.329351		4.85	0.129791		4.85	0.479557		4.85	0.339983		4.85	0.420723		4.85	0.0561274		4.85	0.103314		4.85	0.298353
4.9	0.189883		4.9	0.219441		4.9	0.208885		4.9	0.336568		4.9	0.127722		4.9	0.506845		4.9	0.343799		4.9	0.436207		4.9	0.0988234		4.9	0.103579		4.9	0.304677
4.95	0.184938		4.95	0.233139		4.95	0.308318		4.95	0.35833		4.95	0.125654		4.95	0.529004		4.95	0.347615		4.95	0.450778		4.95	0.222954		4.95	0.103844		4.95	0.313826
5	0.179993		5	0.26106		5	0.420947		5	0.380093		5	0.123585		5	0.551162		5	0.351431		5	0.465349		5	0.41997		5	0.104109		5	0.325501
5.05	0.175049		5.05	0.294297		5.05	0.62882		5.05	0.402143		5.05	0.120766		5.05	0.57332		5.05	0.355247		5.05	0.479571		5.05	0.555788		5.05	0.105047		5.05	0.339663
5.1	0.262509		5.1	0.327535		5.1	0.784772		5.1	0.438571		5.1	0.117318		5.1	0.597068		5.1	0.362959		5.1	0.493582		5.1	0.604611		5.1	0.106042		5.1	0.357222
5.15	0.393047		5.15	0.360772		5.15	0.901253		5.15	0.533113		5.15	0.11387		5.15	0.621519		5.15	0.37877		5.15	0.507593		5.15	0.59777		5.15	0.107037		5.15	0.376708
5.2	0.523584		5.2	0.394009		5.2	0.855687		5.2	0.572856		5.2	0.110422		5.2	0.645969		5.2	0.394582		5.2	0.521604		5.2	0.590929		5.2	0.108032		5.2	0.400057
5.25	0.654122		5.25	0.427247		5.25	0.806847		5.25	0.710424		5.25	0.106974		5.25	0.664986		5.25	0.410394		5.25	0.538185		5.25	0.589615		5.25	0.109026		5.25	0.427691
5.3	0.784659		5.3	0.483308		5.3	0.758007		5.3	0.751369		5.3	0.103527		5.3	0.684003		5.3	0.429909		5.3	0.555371		5.3	0.615326		5.3	0.110021		5.3	0.457254
5.35	0.840106		5.35	0.552925		5.35	0.735034		5.35	0.797273		5.35	0.102328		5.35	0.70302		5.35	0.450135		5.35	0.572558		5.35	0.641037		5.35	0.112424		5.35	0.489762
5.4	0.664738		5.4	0.622542		5.4	0.712451		5.4	0.857607		5.4	0.106637		5.4	0.722037		5.4	0.475202		5.4	0.589745		5.4	0.680264		5.4	0.115191		5.4	0.527532
5.45	0.497207		5.45	0.678302		5.45	0.694663		5.45	0.873692		5.45	0.110947		5.45	0.746265		5.45	0.502155		5.45	0.60677		5.45	0.739553		5.45	0.117958		5.45	0.56631
5.5	0.432477		5.5	0.72987		5.5	0.678023		5.5	0.889777		5.5	0.11755		5.5	0.770716		5.5	0.529109		5.5	0.619956		5.5	0.798842		5.5	0.120725		5.5	0.608333
5.55	0.367748		5.55	0.729377		5.55	0.665484		5.55	0.905584		5.55	0.135939		5.55	0.792869		5.55	0.566647		5.55	0.633143		5.55	0.853175		5.55	0.123492		5.55	0.649174
5.6	0.303018		5.6	0.672501		5.6	0.697576		5.6	0.918831		5.6	0.154328		5.6	0.808659		5.6	0.594002		5.6	0.64633		5.6	0.898639		5.6	0.128216		5.6	0.692051
5.65	0.245655		5.65	0.615624		5.65	0.729668		5.65	0.932078		5.65	0.165575		5.65	0.82445		5.65	0.622001		5.65	0.659517		5.65	0.944104		5.65	0.144283		5.65	0.732601
5.7	0.268598		5.7	0.549739		5.7	0.761759		5.7	0.918312		5.7	0.175229		5.7	0.840241		5.7	0.652538		5.7	0.672703		5.7	0.986087		5.7	0.16035		5.7	0.767061
5.75	0.291541		5.75	0.455197		5.75	0.805825		5.75	0.902857		5.75	0.184883		5.75	0.856032		5.75	0.681571		5.75	0.678396		5.75	0.939296		5.75	0.176417		5.75	0.798507
5.8	0.314484		5.8	0.387485		5.8	0.852576		5.8	0.887403		5.8	0.194537		5.8	0.871823		5.8	0.70952		5.8	0.679798		5.8	0.892505		5.8	0.200387		5.8	0.823613
5.85	0.354154		5.85	0.344205		5.85	0.899327		5.85	0.872149		5.85	0.20437		5.85	0.882875		5.85	0.722292		5.85	0.680378		5.85	0.845714		5.85	0.22908		5.85	0.841081
5.9	0.415054		5.9	0.300924		5.9	0.936064		5.9	0.860106		5.9	0.214222		5.9	0.893267		5.9	0.734438		5.9	0.672905		5.9	0.788234		5.9	0.256708		5.9	0.851933
5.95	0.618524		5.95	0.257644		5.95	0.96459		5.95	0.848064		5.95	0.224073		5.95	0.903658		5.95	0.746584		5.95	0.665433		5.95	0.717163		5.95	0.283598		5.95	0.851996
6	0.786641		6	0.218433		6	0.979857		6	0.836021		6	0.233924		6	0.91405		6	0.750743		6	0.65796		6	0.646092		6	0.310488		6	0.845124
6.05	0.878214		6.05	0.18298		6.05	0.987651		6.05	0.823979		6.05	0.243775		6.05	0.917872		6.05	0.748535		6.05	0.650488		6.05	0.605701		6.05	0.352642		6.05	0.833168
6.1	0.954691		6.1	0.152111		6.1	0.982464		6.1	0.810246		6.1	0.256851		6.1	0.911323		6.1	0.746326		6.1	0.643015		6.1	0.566935		6.1	0.382638		6.1	0.814073
6.15	0.937672		6.15	0.136399		6.15	0.977278		6.15	0.792816		6.15	0.27409		6.15	0.904774		6.15	0.744118		6.15	0.632087		6.15	0.528169		6.15	0.405418		6.15	0.790176
6.2	0.872623		6.2	0.120687		6.2	0.972091		6.2	0.775386		6.2	0.29133		6.2	0.898225		6.2	0.741909		6.2	0.615274		6.2	0.513153		6.2	0.425252		6.2	0.762831
6.25	0.807574		6.25	0.104975		6.25	0.966905		6.25	0.757956		6.25	0.314486		6.25	0.891675		6.25	0.7397		6.25	0.601053		6.25	0.500611		6.25	0.443124		6.25	0.733076
6.3	0.75444		6.3	0.0892627		6.3	0.961718		6.3	0.74		6.3	0.350845		6.3	0.885126		6.3	0.737492		6.3	0.589844		6.3	0.488069		6.3	0.451747		6.3	0.700696
6.35	0.719279		6.35	0.090084		6.35	0.956258		6.35	0.72013		6.35	0.389191		6.35	0.878289		6.35	0.720742		6.35	0.578635		6.35	0.47639		6.35	0.458246		6.35	0.668049
6.4	0.684117		6.4	0.0995428		6.4	0.93724		6.4	0.70026		6.4	0.437992		6.4	0.868916		6.4	0.70256		6.4	0.567427		6.4	0.491284		6.4	0.46406		6.4	0.636187
6.45	0.658631		6.45	0.109002		6.45	0.941453		6.45	0.682121		6.45	0.486792		6.45	0.859544		6.45	0.684378		6.45	0.553799		6.45	0.506177		6.45	0.457391		6.45	0.600727
6.5	0.694233		6.5	0.118461		6.5	0.947396		6.5	0.665011		6.5	0.549288		6.5	0.850171		6.5	0.666197		6.5	0.538854		6.5	0.521071		6.5	0.44857		6.5	0.567193
6.55	0.729834		6.55	0.127919		6.55	0.953339		6.55	0.6479		6.55	0.614725		6.55	0.840798		6.55	0.64		6.55	0.523909		6.55	0.535964		6.55	0.429492		6.55	0.540052
6.6	0.771378		6.6	0.137378		6.6	0.959282		6.6	0.63079		6.6	0.663762		6.6	0.831426		6.6	0.616341		6.6	0.508964		6.6	0.572155		6.6	0.425907		6.6	0.508124
6.65	0.832032		6.65	0.146837		6.65	0.965908		6.65	0.61368		6.65	0.701568		6.65	0.822053		6.65	0.593119		6.65	0.497712		6.65	0.622323		6.65	0.422322		6.65	0.481441
6.7	0.890622		6.7	0.156296		6.7	0.973039		6.7	0.599165		6.7	0.727772		6.7	0.810791		6.7	0.566984		6.7	0.487204		6.7	0.665907		6.7	0.418736		6.7	0.458516
6.75	0.918312		6.75	0.165755		6.75	0.980171		6.75	0.587811		6.75	0.753976		6.75	0.796273		6.75	0.539838		6.75	0.476696		6.75	0.699191		6.75	0.41496		6.75	0.435331
6.8	0.946002		6.8	0.188883		6.8	0.987302		6.8	0.576456		6.8	0.745323		6.8	0.781756		6.8	0.522334		6.8	0.466187		6.8	0.732476		6.8	0.407135		6.8	0.412372
6.85	0.959283		6.85	0.213746		6.85	0.988047		6.85	0.565102		6.85	0.709312		6.85	0.767238		6.85	0.506765		6.85	0.455679		6.85	0.76576		6.85	0.399309		6.85	0.393564
6.9	0.898629		6.9	0.238609		6.9	0.965861		6.9	0.553748		6.9	0.680606		6.9	0.749081		6.9	0.491196		6.9	0.447435		6.9	0.744715		6.9	0.384948		6.9	0.375353
6.95	0.837975		6.95	0.263472		6.95	0.943674		6.95	0.542393		6.95	0.653713		6.95	0.72987		6.95	0.476039		6.95	0.439962		6.95	0.709441		6.95	0.365782		6.95	0.359703
7	0.809906		7	0.288336		7	0.921487		7	0.531039		7	0.626819		7	0.710659		7	0.46092		7	0.43249		7	0.629264		7	0.347061		7	0.342566
7.05	0.782216		7.05	0.320788		7.05	0.869776		7.05	0.519685		7.05	0.599926		7.05	0.695868		7.05	0.445802		7.05	0.425017		7.05	0.519648		7.05	0.328411		7.05	0.328097
7.1	0.76042		7.1	0.359464		7.1	0.816527		7.1	0.50833		7.1	0.567142		7.1	0.683643		7.1	0.43372		7.1	0.418762		7.1	0.423493		7.1	0.272416		7.1	0.316539
7.15	0.798988		7.15	0.39814		7.15	0.760728		7.15	0.497965		7.15	0.533648		7.15	0.671417		7.15	0.421646		7.15	0.412597		7.15	0.337396		7.15	0.241529		7.15	0.302921
7.2	0.837556		7.2	0.436816		7.2	0.696281		7.2	0.489134		7.2	0.500647		7.2	0.659192		7.2	0.409572		7.2	0.406432		7.2	0.260054		7.2	0.213315		7.2	0.293579
7.25	0.875749		7.25	0.485055		7.25	0.631833		7.25	0.480303		7.25	0.470305		7.25	0.646967		7.25	0.398741		7.25	0.400267		7.25	0.193311		7.25	0.193966		7.25	0.283682
7.3	0.91234		7.3	0.534045		7.3	0.579996		7.3	0.471472		7.3	0.439128		7.3	0.634742		7.3	0.389202		7.3	0.394102		7.3	0.142508		7.3	0.174617		7.3	0.273754
7.35	0.94893		7.35	0.583935		7.35	0.531773		7.35	0.462641		7.35	0.40465		7.35	0.622517		7.35	0.379664		7.35	0.387938		7.35	0.106674		7.35	0.163451		7.35	0.263991
7.4	0.955642		7.4	0.646247		7.4	0.483551		7.4	0.45381		7.4	0.384179		7.4	0.610292		7.4	0.370125		7.4	0.383163		7.4	0.0864305		7.4	0.154963		7.4	0.256672
7.45	0.889186		7.45	0.708558		7.45	0.435328		7.45	0.444978		7.45	0.371641		7.45	0.598066		7.45	0.361077		7.45	0.379426		7.45	0.078766		7.45	0.146476		7.45	0.248567
7.5	0.790981		7.5	0.77087		7.5	0.407317		7.5	0.436147		7.5	0.359103		7.5	0.585841		7.5	0.354768		7.5	0.37569		7.5	0.0711015		7.5	0.137988		7.5	0.241401
7.55	0.574261		7.55	0.82968		7.55	0.380031		7.55	0.427316		7.55	0.346565		7.55	0.573616		7.55	0.34846		7.55	0.371954		7.55	0.063437		7.55	0.1295		7.55	0.234917
7.6	0.499894		7.6	0.886485		7.6	0.352745		7.6	0.422177		7.6	0.3354		7.6	0.561391		7.6	0.342151		7.6	0.371047		7.6	0.0557725		7.6	0.124952		7.6	0.229314
7.65	0.298557		7.65	0.943291		7.65	0.325459		7.65	0.417112		7.65	0.326913		7.65	0.549166		7.65	0.335842		7.65	0.371047		7.65	0.0541695		7.65	0.122553		7.65	0.222614
7.7	0.225773		7.7	0.981924		7.7	0.298174		7.7	0.412047		7.7	0.318426		7.7	0.536941		7.7	0.330093		7.7	0.376441		7.7	0.0570959		7.7	0.120154		7.7	0.216907
7.75	0.16363		7.75	1.00771		7.75	0.270888		7.75	0.406982		7.75	0.309938		7.75	0.524715		7.75	0.325837		7.75	0.40166		7.75	0.0600223		7.75	0.117756		7.75	0.212002
7.8	0.138698		7.8	1.03349		7.8	0.254133		7.8	0.401917		7.8	0.301451		7.8	0.51249		7.8	0.32158		7.8	0.42776		7.8	0.0629488		7.8	0.115357		7.8	0.206992
7.85	0.113765		7.85	1.02317		7.85	0.241828		7.85	0.396853		7.85	0.29385		7.85	0.503052		7.85	0.317323		7.85	0.454562		7.85	0.0658752		7.85	0.112959		7.85	0.202393
7.9	0.088832		7.9	0.999224		7.9	0.229522		7.9	0.391788		7.9	0.288804		7.9	0.496765		7.9	0.313067		7.9	0.499397		7.9	0.0688017		7.9	0.111392		7.9	0.198105
7.95	0.0638992		7.95	0.975282		7.95	0.217217		7.95	0.386571		7.95	0.283758		7.95	0.490478		7.95	0.30881		7.95	0.550646		7.95	0.0717281		7.95	0.11145		7.95	0.194225
8	0.0389664		8	0.95134		8	0.204991		8	0.381273		8	0.278713		8	0.484191		8	0.304553		8	0.57167		8	0.0746546		8	0.111507		8	0.190252
8.05	0.0197627		8.05	0.897398		8.05	0.193753		8.05	0.375974		8.05	0.273667		8.05	0.477903		8.05	0.302276		8.05	0.559341		8.05	0.0786397		8.05	0.111564		8.05	0.186382
8.1	0.0184866		8.1	0.831946		8.1	0.182516		8.1	0.370675		8.1	0.268621		8.1	0.471616		8.1	0.300294		8.1	0.547011		8.1	0.0854807		8.1	0.111622		8.1	0.182337
8.15	0.0172106		8.15	0.767997		8.15	0.172052		8.15	0.365377		8.15	0.263576		8.15	0.465329		8.15	0.298312		8.15	0.533282		8.15	0.0923218		8.15	0.111679		8.15	0.178539
8.2	0.0159346		8.2	0.708693		8.2	0.17059		8.2	0.360078		8.2	0.25853		8.2	0.459042		8.2	0.29633		8.2	0.516469		8.2	0.0991628		8.2	0.11178		8.2	0.174843
8.25	0.0146586		8.25	0.64939		8.25	0.169127		8.25	0.354779		8.25	0.254833		8.25	0.449893		8.25	0.294349		8.25	0.499656		8.25	0.106004		8.25	0.11324		8.25	0.171361
8.3	0.0133825		8.3	0.594641		8.3	0.167664		8.3	0.349481		8.3	0.255309		8.3	0.438933		8.3	0.292367		8.3	0.482843		8.3	0.112845		8.3	0.1147		8.3	0.168105
8.35	0.0121065		8.35	0.547174		8.35	0.16357		8.35	0.344221		8.35	0.255784		8.35	0.427972		8.35	0.290385		8.35	0.46603		8.35	0.118057		8.35	0.11616		8.35	0.165184
8.4	0.0108305		8.4	0.502793		8.4	0.157231		8.4	0.340909		8.4	0.25626		8.4	0.417012		8.4	0.288854		8.4	0.449655		8.4	0.115967		8.4	0.11762		8.4	0.162509
8.45	0.00955444		8.45	0.466051		8.45	0.151221		8.45	0.337597		8.45	0.256735		8.45	0.406051		8.45	0.287482		8.45	0.433352		8.45	0.113876		8.45	0.119081		8.45	0.159875
8.5	0.00827841		8.5	0.429309		8.5	0.14858		8.5	0.334286		8.5	0.257211		8.5	0.395091		8.5	0.286111		8.5	0.417048		8.5	0.111786		8.5	0.120541		8.5	0.157492
8.55	0.00700239		8.55	0.392566		8.55	0.145938		8.55	0.330974		8.55	0.254354		8.55	0.384235		8.55	0.28474		8.55	0.400267		8.55	0.109696		8.55	0.122429		8.55	0.155082
8.6	0.00574892		8.6	0.363068		8.6	0.143297		8.6	0.327662		8.6	0.24905		8.6	0.374302		8.6	0.283368		8.6	0.382654		8.6	0.107605		8.6	0.124481		8.6	0.152723
8.65	0.00789629		8.65	0.341582		8.65	0.140656		8.65	0.324351		8.65	0.243745		8.65	0.364369		8.65	0.281997		8.65	0.365928		8.65	0.105515		8.65	0.126533		8.65	0.150377
8.7	0.0100437		8.7	0.320095		8.7	0.136991		8.7	0.321039		8.7	0.238441		8.7	0.354436		8.7	0.280626		8.7	0.35472		8.7	0.100194		8.7	0.128586		8.7	0.148121
8.75	0.012191		8.75	0.298608		8.75	0.128909		8.75	0.317857		8.75	0.233136		8.75	0.347172		8.75	0.278908		8.75	0.343511		8.75	0.0921317		8.75	0.130638		8.75	0.145981
8.8	0.0143384		8.8	0.277121		8.8	0.120826		8.8	0.315055		8.8	0.228324		8.8	0.34247		8.8	0.276965		8.8	0.332302		8.8	0.0840691		8.8	0.13269		8.8	0.144168
8.85	0.0164858		8.85	0.255635		8.85	0.112744		8.85	0.312253		8.85	0.224014		8.85	0.337768		8.85	0.275021		8.85	0.321113		8.85	0.0760064		8.85	0.134407		8.85	0.142228
8.9	0.0186332		8.9	0.234148		8.9	0.104661		8.9	0.309451		8.9	0.219705		8.9	0.333066		8.9	0.273078		8.9	0.313353		8.9	0.0893446		8.9	0.135653		8.9	0.140246
8.95	0.0207805		8.95	0.22041		8.95	0.096579		8.95	0.306648		8.95	0.215395		8.95	0.328364		8.95	0.271134		8.95	0.305593		8.95	0.113383		8.95	0.136898		8.95	0.138034
9	0.0229279		9	0.211589		9	0.119483		9	0.303846		9	0.211085		9	0.323662		9	0.269191		9	0.297834		9	0.137422		9	0.138143		9	0.135941
9.05	0.0250753		9.05	0.202768		9.05	0.153129		9.05	0.301044		9.05	0.206775		9.05	0.321753		9.05	0.267247		9.05	0.290074		9.05	0.166161		9.05	0.139388		9.05	0.134242
9.1	0.0272226		9.1	0.193947		9.1	0.186775		9.1	0.298242		9.1	0.2027		9.1	0.321197		9.1	0.265727		9.1	0.296696		9.1	0.203786		9.1	0.140633		9.1	0.133049
9.15	0.02937		9.15	0.185126		9.15	0.221596		9.15	0.29544		9.15	0.199363		9.15	0.320641		9.15	0.264679		9.15	0.305414		9.15	0.241412		9.15	0.141899		9.15	0.131884
9.2	0.0315174		9.2	0.176306		9.2	0.261029		9.2	0.292637		9.2	0.196026		9.2	0.320086		9.2	0.26363		9.2	0.314132		9.2	0.272211		9.2	0.143257		9.2	0.130563
9.25	0.0352744		9.25	0.167485		9.25	0.300462		9.25	0.289835		9.25	0.19269		9.25	0.31953		9.25	0.262582		9.25	0.32285		9.25	0.301855		9.25	0.144616		9.25	0.129364
9.3	0.0424323		9.3	0.158664		9.3	0.339895		9.3	0.287081		9.3	0.189353		9.3	0.322189		9.3	0.261533		9.3	0.331568		9.3	0.3315		9.3	0.145975		9.3	0.128621
9.35	0.0495902		9.35	0.149843		9.35	0.379328		9.35	0.285491		9.35	0.186016		9.35	0.32601		9.35	0.260484		9.35	0.339818		9.35	0.352993		9.35	0.147334		9.35	0.127787
9.4	0.0567481		9.4	0.141022		9.4	0.401577		9.4	0.283901		9.4	0.182869		9.4	0.32983		9.4	0.259436		9.4	0.345422		9.4	0.372589		9.4	0.148692		9.4	0.126705
9.45	0.063906		9.45	0.132201		9.45	0.411086		9.45	0.282312		9.45	0.180571		9.45	0.33365		9.45	0.258518		9.45	0.351027		9.45	0.392186		9.45	0.150051		9.45	0.125733
9.5	0.0710639		9.5	0.128753		9.5	0.420594		9.5	0.280722		9.5	0.178272		9.5	0.337471		9.5	0.257853		9.5	0.356631		9.5	0.411783		9.5	0.151904		9.5	0.125165
9.55	0.0782218		9.55	0.127141		9.55	0.430035		9.55	0.279132		9.55	0.175973		9.55	0.341291		9.55	0.257189		9.55	0.358712		9.55	0.426267		9.55	0.153918		9.55	0.124345
9.6	0.0853798		9.6	0.12553		9.6	0.437586		9.6	0.277543		9.6	0.173675		9.6	0.345111		9.6	0.256524		9.6	0.353808		9.6	0.432538		9.6	0.155931		9.6	0.123219
9.65	0.0925377		9.65	0.123918		9.65	0.445137		9.65	0.275953		9.65	0.171376		9.65	0.350419		9.65	0.255859		9.65	0.348905		9.65	0.438809		9.65	0.157945		9.65	0.122476
9.7	0.0996956		9.7	0.122307		9.7	0.452688		9.7	0.274364		9.7	0.173059		9.7	0.35694		9.7	0.255195		9.7	0.344001		9.7	0.435632		9.7	0.159959		9.7	0.121897
9.75	0.106853		9.75	0.120695		9.75	0.460239		9.75	0.272774		9.75	0.175158		9.75	0.36346		9.75	0.25453		9.75	0.339097		9.75	0.426574		9.75	0.161973		9.75	0.120693
9.8	0.114011		9.8	0.119084		9.8	0.458847		9.8	0.271184		9.8	0.177257		9.8	0.36998		9.8	0.253926		9.8	0.332626		9.8	0.417516		9.8	0.165451		9.8	0.119835
9.85	0.129006		9.85	0.117472		9.85	0.444368		9.85	0.269759		9.85	0.179356		9.85	0.3765		9.85	0.253554		9.85	0.321417		9.85	0.408458		9.85	0.170276		9.85	0.119314
9.9	0.144829		9.9	0.115861		9.9	0.429889		9.9	0.268813		9.9	0.181454		9.9	0.38302		9.9	0.253182		9.9	0.310209		9.9	0.3994		9.9	0.1751		9.9	0.118321
9.95	0.160652		9.95	0.114249		9.95	0.41541		9.95	0.267866		9.95	0.183553		9.95	0.38954		9.95	0.252811		9.95	0.299		9.95	0.386801		9.95	0.179925		9.95	0.11749
10	0.176474		10	0.112638		10	0.400931		10	0.26692		10	0.185652		10	0.393459		10	0.252439		10	0.287791		10	0.372169		10	0.18475		10	0.116811
10.05	0.192297		10.05	0.111026		10.05	0.386452		10.05	0.265974		10.05	0.18775		10.05	0.396793		10.05	0.252067		10.05	0.280556		10.05	0.387083		10.05	0.189575		10.05	0.115463
10.1	0.212383		10.1	0.109415		10.1	0.402001		10.1	0.265028		10.1	0.189849		10.1	0.400128		10.1	0.251695		10.1	0.274329		10.1	0.402761		10.1	0.194764		10.1	0.114465
10.15	0.268642		10.15	0.107861		10.15	0.459732		10.15	0.264082		10.15	0.191461		10.15	0.403462		10.15	0.251344		10.15	0.268102		10.15	0.418438		10.15	0.201583		10.15	0.11345
10.2	0.334243		10.2	0.109276		10.2	0.517463		10.2	0.263135		10.2	0.193029		10.2	0.406796		10.2	0.251251		10.2	0.261875		10.2	0.434116		10.2	0.208401		10.2	0.111991
10.25	0.410192		10.25	0.110691		10.25	0.575194		10.25	0.262189		10.25	0.194596		10.25	0.417396		10.25	0.251158		10.25	0.255648		10.25	0.473656		10.25	0.21522		10.25	0.111292
10.3	0.503207		10.3	0.112106		10.3	0.632926		10.3	0.261243		10.3	0.196163		10.3	0.42901		10.3	0.251065		10.3	0.24974		10.3	0.532945		10.3	0.222038		10.3	0.110362
10.35	0.600697		10.35	0.113521		10.35	0.690657		10.35	0.260297		10.35	0.19773		10.35	0.440624		10.35	0.250972		10.35	0.247762		10.35	0.592234		10.35	0.228857		10.35	0.109312
10.4	0.691678		10.4	0.114936		10.4	0.743815		10.4	0.259351		10.4	0.199298		10.4	0.452238		10.4	0.250879		10.4	0.245784		10.4	0.683894		10.4	0.235781		10.4	0.108715
10.45	0.763055		10.45	0.116351		10.45	0.794994		10.45	0.258404		10.45	0.200865		10.45	0.466854		10.45	0.250787		10.45	0.243806		10.45	0.807522		10.45	0.242821		10.45	0.107618
10.5	0.776817		10.5	0.117766		10.5	0.846173		10.5	0.257458		10.5	0.202432		10.5	0.48621		10.5	0.250694		10.5	0.241828		10.5	0.90495		10.5	0.249862		10.5	0.10718
10.55	0.73281		10.55	0.119181		10.55	0.897352		10.55	0.256512		10.55	0.204069		10.55	0.505567		10.55	0.250535		10.55	0.23985		10.55	0.982291		10.55	0.256902		10.55	0.10657
10.6	0.688803		10.6	0.120596		10.6	0.939607		10.6	0.255596		10.6	0.205857		10.6	0.510785		10.6	0.250372		10.6	0.237872		10.6	0.924275		10.6	0.263942		10.6	0.105996
10.65	0.586276		10.65	0.122011		10.65	0.862025		10.65	0.254839		10.65	0.207645		10.65	0.509767		10.65	0.250209		10.65	0.235894		10.65	0.852159		10.65	0.270983		10.65	0.105868
10.7	0.471302		10.7	0.123426		10.7	0.784442		10.7	0.254082		10.7	0.209432		10.7	0.508748		10.7	0.250047		10.7	0.233916		10.7	0.725813		10.7	0.276442		10.7	0.105293
10.75	0.382959		10.75	0.124841		10.75	0.70686		10.75	0.253325		10.75	0.21122		10.75	0.496523		10.75	0.249884		10.75	0.231938		10.75	0.569809		10.75	0.280102		10.75	0.105407
10.8	0.304927		10.8	0.126256		10.8	0.629278		10.8	0.252568		10.8	0.213008		10.8	0.484298		10.8	0.249721		10.8	0.22996		10.8	0.439874		10.8	0.283763		10.8	0.10482
10.85	0.247569		10.85	0.127671		10.85	0.551696		10.85	0.251811		10.85	0.214796		10.85	0.472072		10.85	0.249559		10.85	0.228706		10.85	0.353921		10.85	0.287423		10.85	0.104828
10.9	0.217574		10.9	0.129086		10.9	0.472351		10.9	0.251054		10.9	0.216583		10.9	0.459099		10.9	0.249302		10.9	0.229454		10.9	0.287031		10.9	0.291084		10.9	0.104471
10.95	0.191202		10.95	0.130816		10.95	0.37251		10.95	0.250297		10.95	0.218371		10.95	0.44504		10.95	0.249023		10.95	0.230201		10.95	0.242849		10.95	0.294744		10.95	0.104349
11	0.164831		11	0.133048		11	0.272668		11	0.24954		11	0.220159		11	0.430981		11	0.248744		11	0.230948		11	0.207911		11	0.297829		11	0.104178
11.05	0.13846		11.05	0.135279		11.05	0.207708		11.05	0.248783		11.05	0.221947		11.05	0.416922		11.05	0.248465		11.05	0.231695		11.05	0.172972		11.05	0.299434		11.05	0.103866
11.1	0.1216		11.1	0.13751		11.1	0.146581		11.1	0.248026		11.1	0.223423		11.1	0.402863		11.1	0.248186		11.1	0.232443		11.1	0.138034		11.1	0.301039		11.1	0.103941
11.15	0.113047		11.15	0.139742		11.15	0.132762		11.15	0.247269		11.15	0.224802		11.15	0.391611		11.15	0.247907		11.15	0.23319		11.15	0.128574		11.15	0.302645		11.15	0.103628
11.2	0.104494		11.2	0.141973		11.2	0.121545		11.2	0.246512		11.2	0.226181		11.2	0.380608		11.2	0.247628		11.2	0.233937		11.2	0.124095		11.2	0.30425		11.2	0.103872
11.25	0.0959411		11.25	0.144204		11.25	0.134528		11.25	0.245755		11.25	0.227561		11.25	0.369605		11.25	0.247693		11.25	0.234684		11.25	0.119616		11.25	0.305855		11.25	0.103554
11.3	0.0873883		11.3	0.146435		11.3	0.147511		11.3	0.244998		11.3	0.22894		11.3	0.358603		11.3	0.247921		11.3	0.235432		11.3	0.115136		11.3	0.30746		11.3	0.103993
11.35	0.0788354		11.35	0.148667		11.35	0.160494		11.35	0.24424		11.35	0.230319		11.35	0.344082		11.35	0.248149		11.35	0.237205		11.35	0.110945		11.35	0.308712		11.35	0.103863
11.4	0.0702826		11.4	0.150898		11.4	0.173477		11.4	0.243461		11.4	0.231188		11.4	0.324871		11.4	0.248377		11.4	0.23936		11.4	0.106764		11.4	0.309853		11.4	0.104467
11.45	0.0674124		11.45	0.153129		11.45	0.18646		11.45	0.242681		11.45	0.231999		11.45	0.30566		11.45	0.248605		11.45	0.241516		11.45	0.102583		11.45	0.310995		11.45	0.104408
11.5	0.0657171		11.5	0.155361		11.5	0.199443		11.5	0.241902		11.5	0.23281		11.5	0.288445		11.5	0.248832		11.5	0.243671		11.5	0.10399		11.5	0.312136		11.5	0.105107
11.55	0.0640218		11.55	0.157592		11.55	0.212224		11.55	0.241123		11.55	0.233621		11.55	0.27622		11.55	0.24906		11.55	0.245827		11.55	0.108519		11.55	0.313277		11.55	0.105091
11.6	0.0623265		11.6	0.159823		11.6	0.204726		11.6	0.240344		11.6	0.234433		11.6	0.263995		11.6	0.249254		11.6	0.247982		11.6	0.113048		11.6	0.314419		11.6	0.105654
11.65	0.0606312		11.65	0.162055		11.65	0.197229		11.65	0.239565		11.65	0.235244		11.65	0.25177		11.65	0.24942		11.65	0.250138		11.65	0.117577		11.65	0.31543		11.65	0.105716
11.7	0.0589359		11.7	0.16655		11.7	0.189732		11.7	0.238785		11.7	0.235922		11.7	0.241178		11.7	0.249586		11.7	0.252293		11.7	0.122106		11.7	0.316333		11.7	0.106455
11.75	0.0572406		11.75	0.173166		11.75	0.182235		11.75	0.238006		11.75	0.236209		11.75	0.235621		11.75	0.249751		11.75	0.260363		11.75	0.127785		11.75	0.317236		11.75	0.106623
11.8	0.0555453		11.8	0.179782		11.8	0.174737		11.8	0.237227		11.8	0.236497		11.8	0.230064		11.8	0.249917		11.8	0.275308		11.8	0.134056		11.8	0.318139		11.8	0.107073
11.85	0.05385		11.85	0.186397		11.85	0.16724		11.85	0.236448		11.85	0.236784		11.85	0.224507		11.85	0.250083		11.85	0.290253		11.85	0.140327		11.85	0.319041		11.85	0.107562
11.9	0.0521547		11.9	0.193013		11.9	0.159743		11.9	0.235668		11.9	0.237071		11.9	0.21895		11.9	0.250249		11.9	0.305198		11.9	0.146598		11.9	0.319944		11.9	0.108077
11.95	0.0515288		11.95	0.199629		11.95	0.165861		11.95	0.234889		11.95	0.237359		11.95	0.213951		11.95	0.250652		11.95	0.317321		11.95	0.152869		11.95	0.320642		11.95	0.108873
12	0.0514052		12	0.206244		12	0.172992		12	0.23411		12	0.237646		12	0.210215		12	0.251392		12	0.327907		12	0.159539		12	0.320675		12	0.109288
12.05	0.0512816		12.05	0.21286		12.05	0.180124		12.05	0.233331					12.05	0.20648		12.05	0.252131		12.05	0.338493		12.05	0.1668		12.05	0.320708		12.05	0.110403
12.1	0.051158		12.1	0.219476		12.1	0.187255		12.1	0.232713					12.1	0.202744		12.1	0.25287		12.1	0.349079		12.1	0.174061		12.1	0.320742		12.1	0.110862
12.15	0.0510343		12.15	0.226091		12.15	0.193985		12.15	0.232345					12.15	0.199009		12.15	0.253609		12.15	0.359665		12.15	0.181322		12.15	0.320775		12.15	0.112418
12.2	0.0509107		12.2	0.232707		12.2	0.200417		12.2	0.231977					12.2	0.195273		12.2	0.254348		12.2	0.370251		12.2	0.188583		12.2	0.320808		12.2	0.113687
12.25	0.0507871		12.25	0.239323		12.25	0.20685		12.25	0.231609					12.25	0.191538		12.25	0.255087		12.25	0.356534		12.25	0.195289		12.25	0.320842		12.25	0.115932
12.3	0.0506635		12.3	0.245938		12.3	0.213282		12.3	0.231241					12.3	0.187803		12.3	0.255811		12.3	0.340841		12.3	0.198709		12.3	0.320509		12.3	0.118261
12.35	0.0505399		12.35	0.252554		12.35	0.219714		12.35	0.230873					12.35	0.184472		12.35	0.256498		12.35	0.325149		12.35	0.20213		12.35	0.320147		12.35	0.120998
12.4	0.0504163		12.4	0.25912		12.4	0.212442		12.4	0.230505					12.4	0.182542		12.4	0.257184		12.4	0.317301		12.4	0.20555		12.4	0.319785		12.4	0.124856
12.45	0.0502926		12.45	0.263955		12.45	0.20438		12.45	0.230137					12.45	0.180612		12.45	0.257871		12.45	0.312127		12.45	0.208971		12.45	0.319424		12.45	0.128982
12.5	0.0502329		12.5	0.268789		12.5	0.196319		12.5	0.229769					12.5	0.178681		12.5	0.258557		12.5	0.306954		12.5	0.212391		12.5	0.319062		12.5	0.134576
12.55	0.0508844		12.55	0.273624		12.55	0.188257		12.55	0.229401					12.55	0.176751		12.55	0.259243		12.55	0.301781		12.55	0.215249		12.55	0.318701		12.55	0.13996
12.6	0.0515359		12.6	0.278458		12.6	0.180195		12.6	0.229033					12.6	0.174821		12.6	0.25993		12.6	0.296608		12.6	0.208727		12.6	0.318443		12.6	0.145979
12.65	0.0521875		12.65	0.283293		12.65	0.172133		12.65	0.228665					12.65	0.172891		12.65	0.260599		12.65	0.291434		12.65	0.202205		12.65	0.318262		12.65	0.152218
12.7	0.052839		12.7	0.288127		12.7	0.163489		12.7	0.228297					12.7	0.17096		12.7	0.261169		12.7	0.286261		12.7	0.195684		12.7	0.318081		12.7	0.158323
12.75	0.0534905		12.75	0.292962		12.75	0.154575		12.75	0.227929					12.75	0.16903		12.75	0.261739		12.75	0.281088		12.75	0.189162		12.75	0.3179		12.75	0.165048
12.8	0.054142		12.8	0.297796		12.8	0.14566		12.8	0.227561					12.8	0.168246		12.8	0.262309		12.8	0.276884		12.8	0.18264		12.8	0.31772		12.8	0.171104
12.85	0.0547936		12.85	0.302631		12.85	0.136746		12.85	0.227193					12.85	0.167968		12.85	0.26288		12.85	0.273732		12.85	0.176118		12.85	0.317539		12.85	0.177583
12.9	0.0554451		12.9	0.307465		12.9	0.131222		12.9	0.226508					12.9	0.167691		12.9	0.26345		12.9	0.270579		12.9	0.169284		12.9	0.317199		12.9	0.184108
12.95	0.0560966		12.95	0.3123		12.95	0.132685		12.95	0.225772					12.95	0.167413		12.95	0.26402		12.95	0.267427		12.95	0.160505		12.95	0.316664		12.95	0.19056
13	0.0567481		13	0.317134		13	0.134148		13	0.225036					13	0.167135		13	0.264591		13	0.264274		13	0.151725		13	0.316129		13	0.197852
13.05	0.0573997		13.05	0.321688		13.05	0.135611		13.05	0.2243					13.05	0.166857		13.05	0.265186		13.05	0.261122		13.05	0.142946		13.05	0.315593		13.05	0.204787
13.1	0.0580512		13.1	0.326182		13.1	0.137074		13.1	0.223564					13.1	0.166579		13.1	0.265781		13.1	0.257969		13.1	0.134167		13.1	0.315058		13.1	0.212253
13.15	0.0587027		13.15	0.330676		13.15	0.138537		13.15	0.222828					13.15	0.166301		13.15	0.266376		13.15	0.254817		13.15	0.125387		13.15	0.314522		13.15	0.220242
13.2	0.0593542		13.2	0.33517		13.2	0.14		13.2	0.222092					13.2	0.166024		13.2	0.266971		13.2	0.251664		13.2	0.119466		13.2	0.313987		13.2	0.227897
13.25	0.0600058		13.25	0.339664		13.25	0.140062		13.25	0.221356					13.25	0.165746		13.25	0.267566		13.25	0.248512		13.25	0.11542		13.25	0.313562		13.25	0.236158
13.3	0.0617136		13.3	0.344158		13.3	0.135867		13.3	0.22062					13.3	0.165695		13.3	0.268161		13.3	0.246325		13.3	0.111375		13.3	0.313136		13.3	0.24406
13.35	0.0639214		13.35	0.348652		13.35	0.131672		13.35	0.219885					13.35	0.165695		13.35	0.268756		13.35	0.246325		13.35	0.107329		13.35	0.31271		13.35	0.251401
13.4	0.0661293		13.4	0.353146		13.4	0.127477		13.4	0.219149					13.4	0.165695		13.4	0.268959		13.4	0.246325		13.4	0.103283		13.4	0.312285		13.4	0.258701
13.45	0.0683371		13.45	0.35764		13.45	0.123282		13.45	0.218413					13.45	0.165695		13.45	0.269113		13.45	0.246325		13.45	0.0992373		13.45	0.311859		13.45	0.264675
13.5	0.0705449		13.5	0.362134		13.5	0.119087		13.5	0.217677					13.5	0.165695		13.5	0.269266		13.5	0.246325		13.5	0.0951915		13.5	0.311433		13.5	0.269692
13.55	0.0727527		13.55	0.366628		13.55	0.114892		13.55	0.216941					13.55	0.165695		13.55	0.26942		13.55	0.246325		13.55	0.0911457		13.55	0.31103		13.55	0.273722
13.6	0.0749606		13.6	0.371122		13.6	0.110697		13.6	0.216205					13.6	0.165695		13.6	0.269573		13.6	0.246325		13.6	0.0871623		13.6	0.310637		13.6	0.2759
13.65	0.0771684		13.65	0.375616		13.65	0.106502		13.65	0.215714					13.65	0.165695		13.65	0.269726		13.65	0.246325		13.65	0.0855946		13.65	0.310244		13.65	0.277245
13.7	0.081848		13.7	0.379946		13.7	0.102307		13.7	0.215714					13.7	0.165053		13.7	0.26988		13.7	0.246325		13.7	0.0840268		13.7	0.309851		13.7	0.277657
13.75	0.0868447		13.75	0.383874		13.75	0.0965348		13.75	0.215714					13.75	0.16418		13.75	0.270031		13.75	0.246325		13.75	0.0824591		13.75	0.309459		13.75	0.276471
13.8	0.0918413		13.8	0.387802		13.8	0.0907469		13.8	0.215714					13.8	0.163307		13.8	0.270181		13.8	0.2464		13.8	0.0808913		13.8	0.309066		13.8	0.274948
13.85	0.096838		13.85	0.39173		13.85	0.084959		13.85	0.215714					13.85	0.162433		13.85	0.270331		13.85	0.246325		13.85	0.0790114		13.85	0.308698		13.85	0.27299
13.9	0.101835		13.9	0.395658		13.9	0.0791711		13.9	0.215714					13.9	0.16156		13.9	0.270481		13.9	0.246325		13.9	0.0769211		13.9	0.309092		13.9	0.270271
13.95	0.106831		13.95	0.399586		13.95	0.0733832		13.95	0.215714					13.95	0.160687		13.95	0.270631		13.95	0.246325		13.95	0.0748307		13.95	0.309485		13.95	0.267886
14	0.111828		14	0.403514		14	0.0675953		14	0.215714					14	0.159814		14	0.270782		14	0.246325		14	0.0727404		14	0.309879		14	0.265273
